# Supplementary material for: IL-1β dominates the promucin secretory cytokine profile in cystic fibrosis
Source: JCI journal article supplement (doi:10.1172/jci125669), 2019-09-15
Supplement: sd1 [file 1]

# Online Supplementary Data:

## **IL-1 $\beta$ dominates the pro-mucin secretory cytokine profile in cystic fibrosis**

Gang Chen<sup>1</sup>, Ling Sun<sup>1,2</sup>, Takafumi Kato<sup>1</sup>, Kenichi Okuda<sup>1</sup>, Mary B. Martino<sup>1</sup>, Aiman Abzhanova<sup>1</sup>, Jennifer M. Lin<sup>1</sup>, Rodney C. Gilmore<sup>1</sup>, Bethany D. Batson<sup>1</sup>, Yvonne K. O'Neal<sup>1</sup>, Allison S. Volmer<sup>1</sup>, Hong Dang<sup>1</sup>, Yangmei Deng<sup>1</sup>, Scott H. Randell<sup>1</sup>, Brian Button<sup>1</sup>, Alessandra Livraghi-Butrico<sup>1</sup>, Mehmet Kesimer<sup>1</sup>, Carla M.P. Ribeiro<sup>1</sup>, Wanda K. O'Neal<sup>1</sup> and Richard C. Boucher<sup>1#</sup>

<sup>1</sup>Marsico Lung Institute and University of North Carolina Cystic Fibrosis Center, University of North Carolina at Chapel Hill, Chapel Hill, NC 27599 USA

<sup>2</sup>Research Center of Regeneration Medicine, West China Hospital, Sichuan University, Chengdu, Sichuan Province, China.

## **I: Supplementary Table 1 and Supplementary Figures 1-14:**

## Supplementary Table 1

| Treatment                       | number of codes tested (n=) | <i>MUC5B</i> mRNA  |       |         | <i>MUC5AC</i> mRNA |       |         |
|---------------------------------|-----------------------------|--------------------|-------|---------|--------------------|-------|---------|
|                                 |                             | Fold Change (mean) | SE    | P value | Fold Change (mean) | SE    | P value |
| <b>SAMS</b>                     | 8                           | 68.12              | 23.00 | 0.008   | 159.52             | 56.96 | 0.008   |
| <b>IL1<math>\alpha</math></b>   | 6                           | 40.25              | 10.59 | 0.031   | 27.03              | 7.19  | 0.031   |
| <b>IL1<math>\beta</math></b>    | 12                          | 70.62              | 16.14 | <0.001  | 11.89              | 4.01  | <0.001  |
| <b>TNF<math>\alpha</math></b>   | 8                           | 9.30               | 2.96  | 0.008   | 7.00               | 1.47  | 0.008   |
| <b>IL8</b>                      | 8                           | 0.88               | 0.34  | 0.078   | 1.76               | 0.56  | 0.945   |
| <b>IL13</b>                     | 12                          | 0.21               | 0.04  | <0.001  | 12.01              | 4.07  | 0.021   |
| <b>IL17A</b>                    | 12                          | 6.19               | 0.81  | <0.001  | 5.51               | 1.77  | 0.043   |
| <b>IL17F</b>                    | 12                          | 18.98              | 6.32  | <0.001  | 8.22               | 5.60  | 0.151   |
| <b>IFN<math>\alpha</math></b>   | 12                          | 1.07               | 0.27  | 0.380   | 3.23               | 1.26  | 0.910   |
| <b>IFN<math>\beta</math></b>    | 12                          | 3.79               | 1.35  | 0.007   | 29.50              | 22.94 | 0.092   |
| <b>IFN<math>\gamma</math></b>   | 12                          | 0.53               | 0.06  | <0.001  | 0.73               | 0.21  | 0.043   |
| <b>IFN<math>\lambda</math>1</b> | 12                          | 0.82               | 0.11  | 0.301   | 1.53               | 0.51  | 0.733   |
| <b>IFN<math>\lambda</math>2</b> | 12                          | 11.53              | 4.47  | 0.052   | 1.46               | 0.45  | 0.519   |

17

18 **Supplementary Table 1: Expression of *MUC5AC* and *MUC5B* mRNAs in non-CF HBE cells**  
19 **following cytokine exposure.** Fully differentiated non-CF HBE cells were cultured under ALI conditions  
20 and exposed with cytokines from the basolateral side in ALI media at a concentration of 10ng/ml for 3  
21 days. Undiluted SAMS (50 $\mu$ l) was administered from the apical side of the cells. Expression of *MUC5AC*  
22 and *MUC5B* mRNAs was quantitatively measured by Taqman assays. Cytokines present in SAMS: IL1 $\alpha$   
23 (n=6 codes), IL1 $\beta$  (n=12 codes), TNF $\alpha$  (n=8 codes) and IL8 (n=8 codes); SAMS (n=8 codes); TH2 and  
24 TH17 cytokines IL13, IL17A and IL17F (all tested with n=12 codes); and interferons involved in antiviral  
25 responses IFN $\alpha$ , IFN $\beta$ , IFN $\gamma$ , IFN $\lambda$ 1 and IFN $\lambda$ 2 (all tested with n=12 codes). Means of fold changes of  
26 *MUC5B* and *MUC5AC* mRNA are presented. Values of relative expression of *MUC5B* and *MUC5AC*  
27 mRNAs exposed with inflammatory mediators versus the PBS control were analyzed with 2-tailed paired  
28 Wilcoxon tests, and P values are shown. One code means the cells obtained from one individual donor  
29 lung. Note, not all treatments were applied to exactly the same codes.

# Supplementary Figure 1

**A**

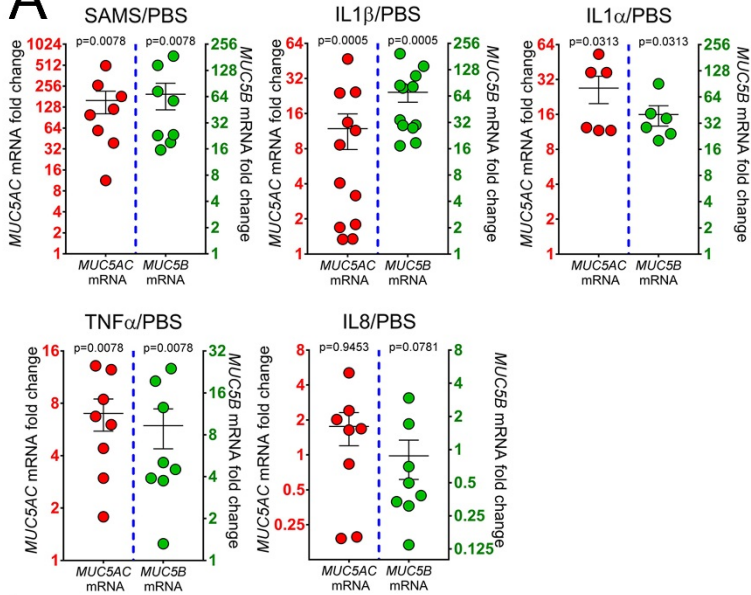

**B**

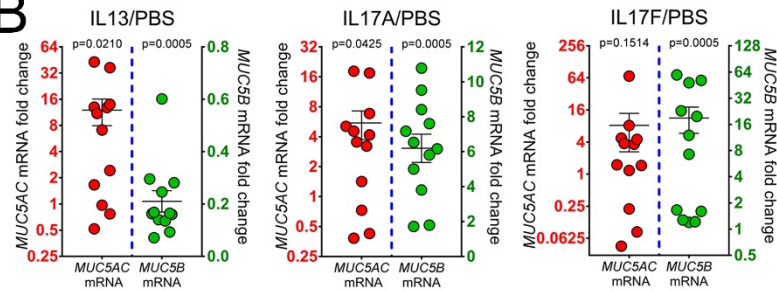

**C**

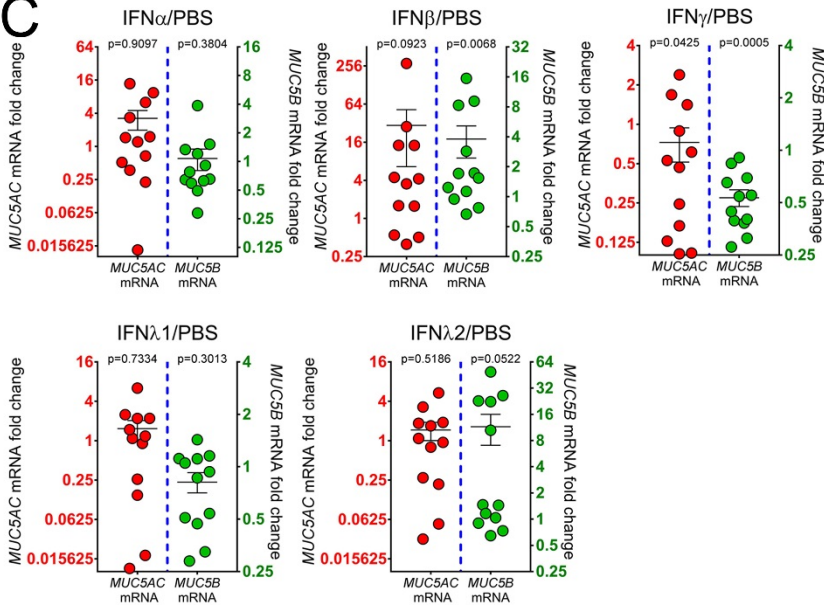

31 **Supplementary Figure 1: Fold changes of *MUC5AC* and *MUC5B* mRNAs in responses to SAMS and**  
32 **constituent inflammatory mediators vs. PBS in non-CF HBE cells.** Fully differentiated non-CF HBE  
33 cells were cultured under ALI conditions and exposed with cytokines or interferons (indicated in the  
34 panels) or PBS from basolateral side in the ALI media at the concentration of 10ng/ml for 3 days.  
35 Undiluted SAMS (50 $\mu$ l) was administered from the apical side of the cells. Expression of *MUC5B* and  
36 *MUC5AC* mRNAs was measured by quantitative RT-PCR. Panel (A) shows the fold changes of *MUC5AC*  
37 and *MUC5B* mRNAs for SAMS (n=8) and proinflammatory cytokines present in SAMS [IL1 $\beta$  (n=12  
38 codes) , IL1 $\alpha$  (n=6 codes), TNF $\alpha$  (n=8 codes), IL8 (n=8 codes)] as compared to PBS exposure in the same  
39 code of HBE cells (means $\pm$ SE). Panel (B) shows the fold changes of *MUC5AC* and *MUC5B* mRNAs in  
40 responses to [IL13, IL17A and IL17F (all tested with n=12 codes)] and to (C) the interferons involved in  
41 antiviral responses [IFN $\alpha$ , IFN $\beta$ , IFN $\gamma$ , IFN $\lambda$ 1 and IFN $\lambda$ 2/3 (all tested with n=12 codes)] vs. PBS control  
42 (means $\pm$ SE). Relative expression of *MUC5B* and *MUC5AC* mRNA exposed with inflammatory mediators  
43 compared to PBS control were analyzed with 2-tailed paired Wilcoxon tests, and p values of such tests  
44 are annotated in the matching panels. One code means the cells obtained from one individual donor lung.  
45 Note, not all treatments were applied to exactly the same codes.

46

# Supplementary Figure 2

## A Design of human *IL1R1* CRISPR gRNA

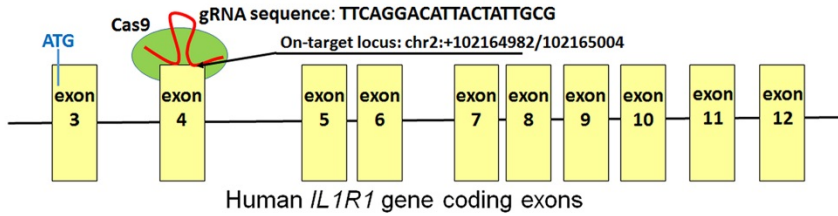

## B *IL1R1* CRISPR gRNA generated mutations in primary HBE cells

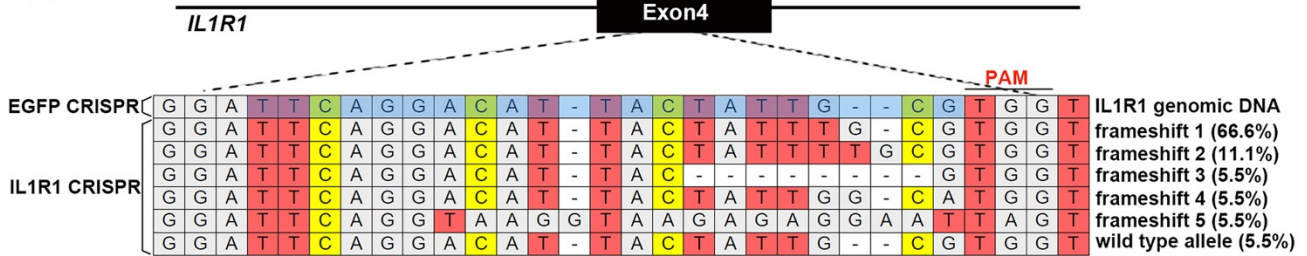

## C test of top 3 off-target locus may be affected by *IL1R1* CRISPR in primary HBE cells

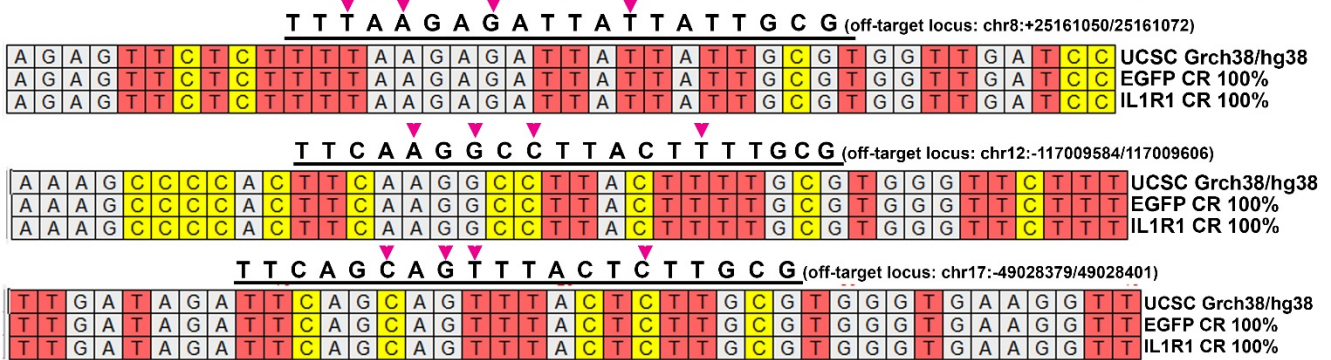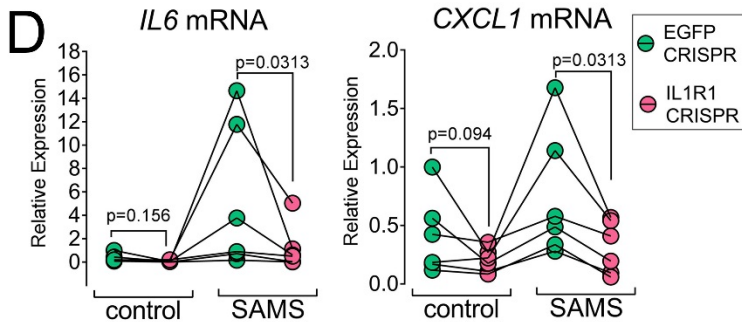

47

48 **Supplementary Figure 2: *IL1R1* CRISPR specifically targets the 4<sup>th</sup> exon of *IL1R1* gene in primary**  
 49 **non-CF HBE cells. On-target and off-target sequences of *IL1R1* CRISPR-Cas9 lentivirus administered**

50 to HBE cells were confirmed by DNA sequencing. Panel (A) shows the cartoon illustration of design of  
51 *IL1R1* gRNA that targets human *IL1R1* gene. (B) Mutations caused by *IL1R1* CRISPR targeting were  
52 identified (sequences analyzed from n=3 codes of HBE cells with n=10-12 clones/code). (C) The top 3  
53 potential off-target loci were evaluated by DNA sequencing of the regions. The off-target loci were  
54 predicted via an online tool: <http://crispr.cos.uni-heidelberg.de/index.html>), and off-target sequences were  
55 analyzed using HBE cells obtained from n=3 non-CF codes, with n=4 clones/code. (D) mRNA expression  
56 of *IL6* and *CXCL1* was measured quantitatively by Taqman assays in HBE cells targeted with EGFP  
57 (control) or *IL1R1* CRISPR followed by exposure to SAMS for 3 days (n=6 codes). Scatter plot-line  
58 graphs present values of code-matched cells infected with EGFP (control CRISPR) or *IL1R1* CRISPRs  
59 followed by exposure with vehicle control (PBS) vs. SAMS (50µl of PBS or 50 µl of undiluted SAMS  
60 were administered on apical surface). Data were analyzed with 2-tailed paired t test between control and  
61 SAMS groups. One code means the cells obtained from one individual donor lung.  
62

# Supplementary Figure 3

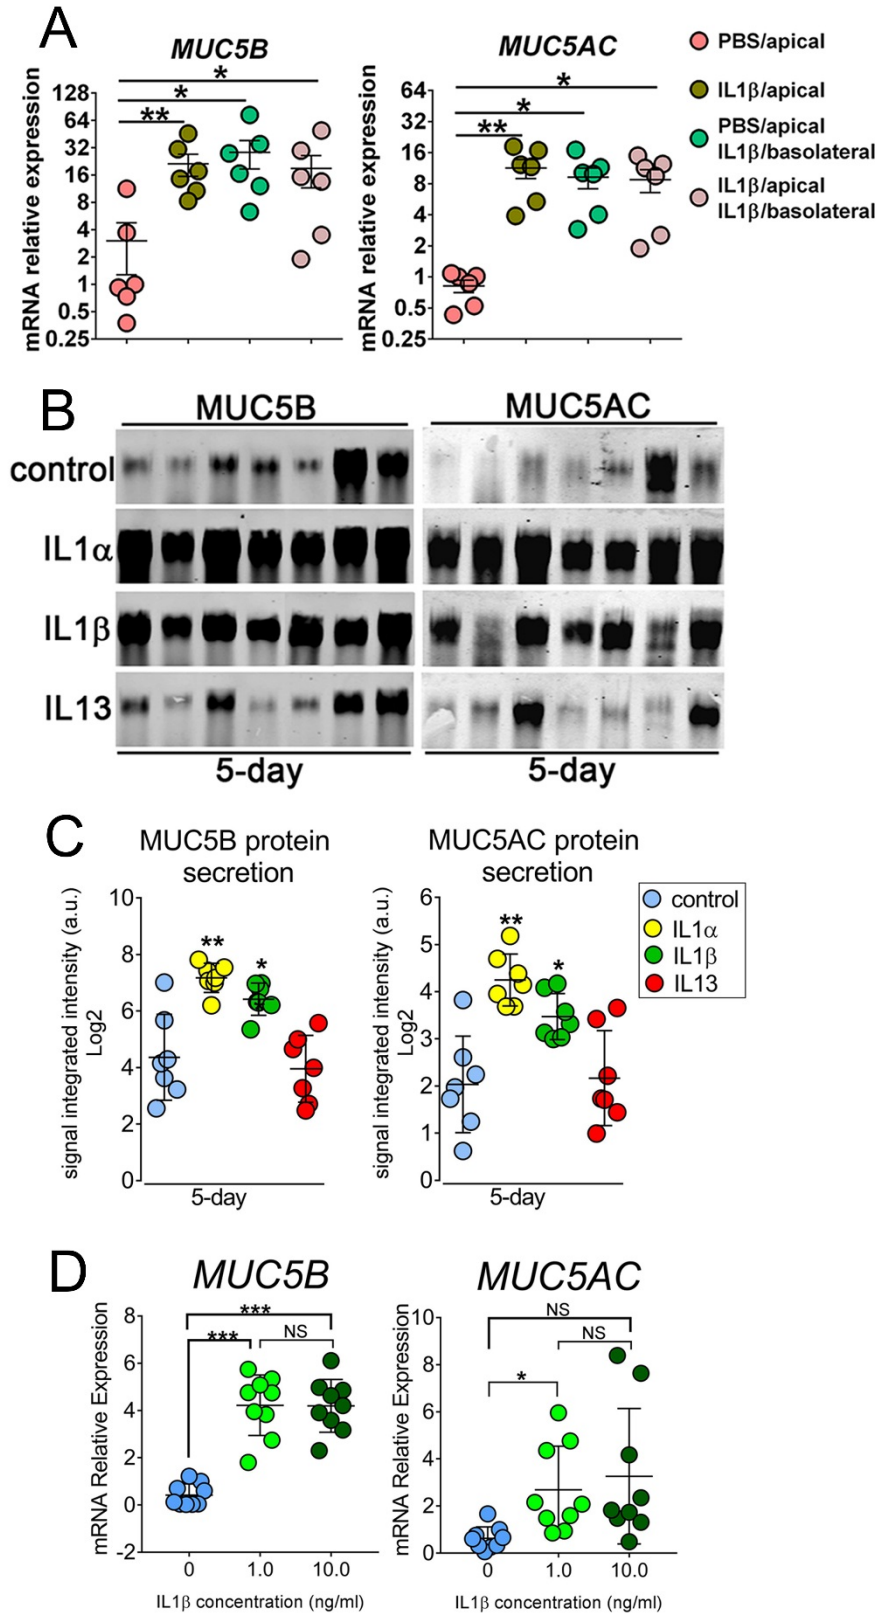

64 **Supplementary Figure 3: IL1 $\alpha$  and IL1 $\beta$  induce MUC5B and MUC5AC proteins secretion from**  
65 **HBE cells. (A)** IL1 $\beta$  (10ng/ml) or vehicle control (PBS) was added from apical, basolateral, or both sides  
66 of 6 codes of non-CF HBE cells (n=6 codes) for 5 days, and mRNA expression of *MUC5B* and *MUC5AC*  
67 was quantified by Taqman assays. **(B)** n=7 codes of non-CF HBE cells were exposed with IL1 $\alpha$ , IL1 $\beta$ ,  
68 and IL13 (all at 10ng/ml in ALI media) from the basolateral side for 5 days. Apical secretions were  
69 collected by washing with 200 $\mu$ l PBS and subjected to agarose mucin western blot to detect MUC5B and  
70 MUC5AC protein expression. **(C)** Secreted MUC5B and MUC5AC protein levels were semi-quantified  
71 using Licor Odyssey software. Note, the value was Log2 transformed. **(D)** Non-CF HBE cells were treated  
72 with IL1 $\beta$  at the concentration of 1 and 10ng/ml from the basolateral side for 5 days, and *MUC5B* and  
73 *MUC5AC* mRNA was quantified by Taqman assays. Graphs present mean $\pm$ SD, and data were analyzed  
74 with one-way ANOVA and Dunnett's test **(C)** and Tukey's test. \*P<0.05; \*\*P<0.01; \*\*\*P<0.001  
75 compared to controls; NS=not significant.



# Supplementary Figure 4

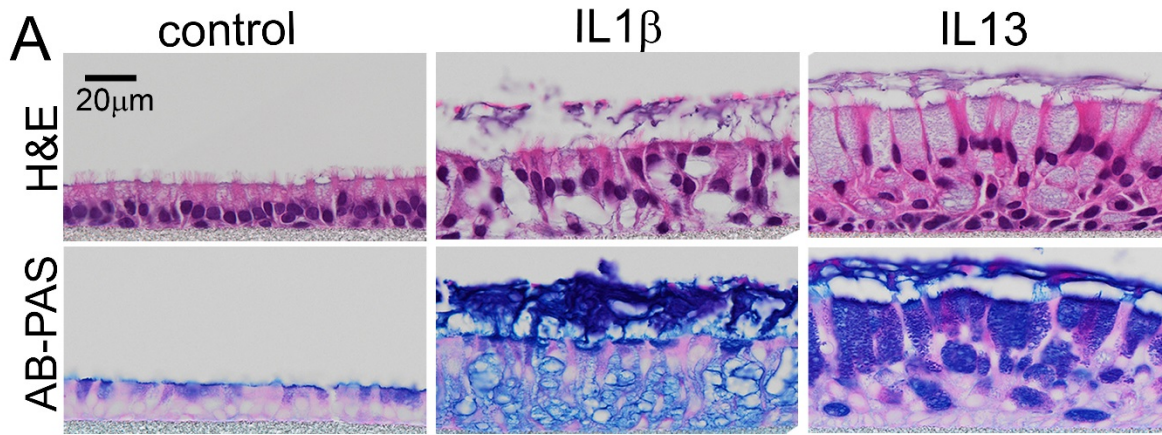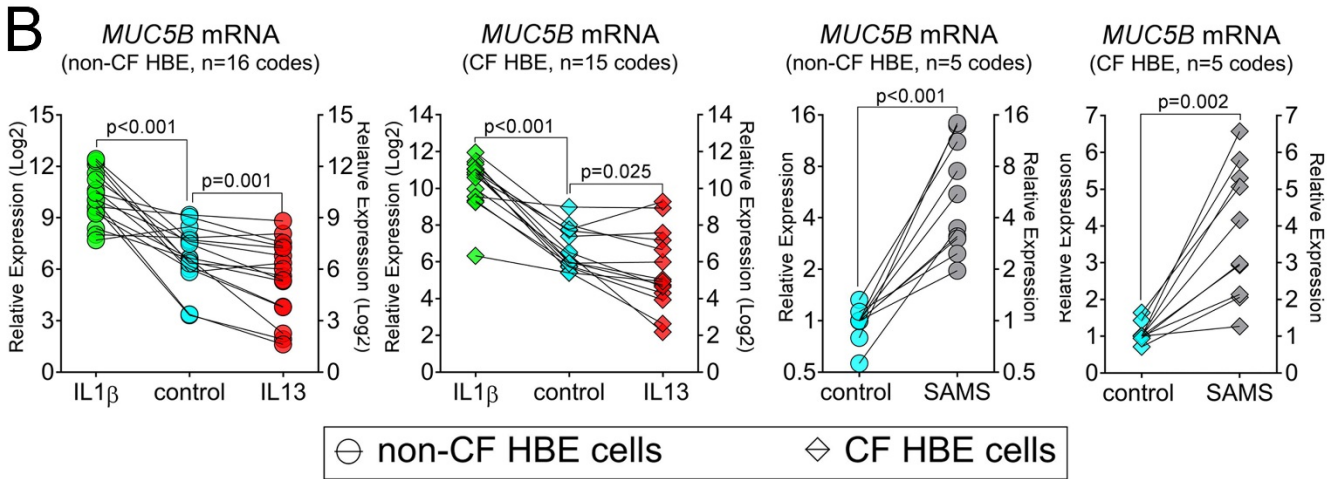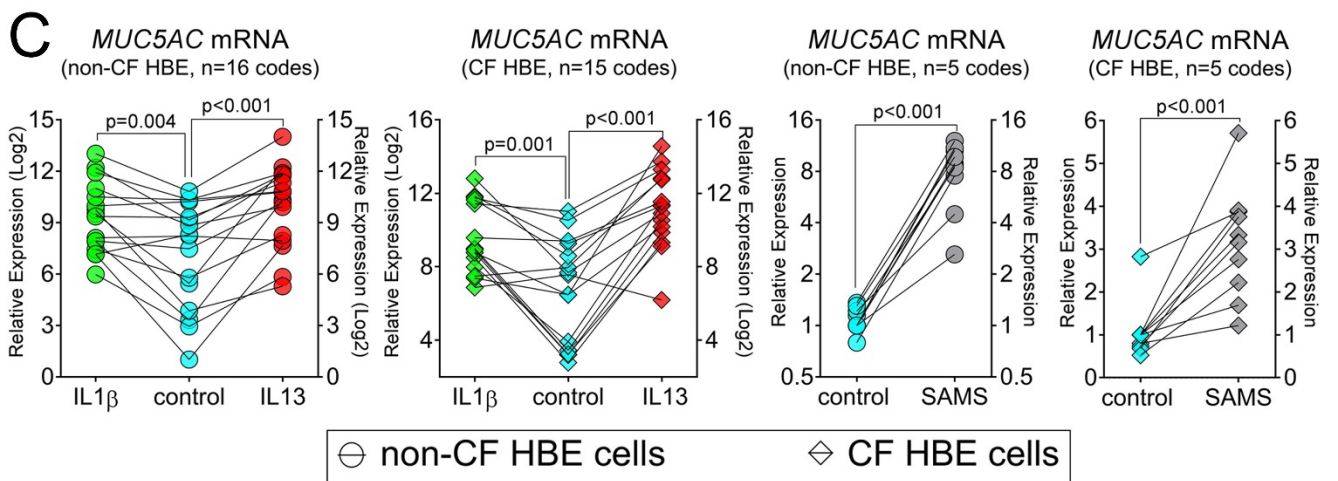

77 **Supplementary Figure 4: IL1 $\beta$  and IL13 cause morphological changes in CF HBE cells; IL1 $\beta$  and**  
78 **IL13 regulate mRNA expression of mucins and ion channel genes in non-CF and CF HBE cells. (A)**  
79 CF HBE cells were exposed to vehicle control (PBS), IL1 $\beta$  or IL13 from the basolateral side (both at  
80 10ng/ml in ALI media) for 7 days. Histological features are shown by H&E staining, and goblet cell  
81 differentiation and mucus production are shown by AB-PAS staining. Micrographs are representative of  
82 n=3 codes of CF HBE cells/treatment. **(B, C)** Non-CF and CF HBE cells exposure with control (PBS),  
83 IL1 $\beta$  or IL13, or PBS vs. SAMS for 7 days. *MUC5B* **(B)** and *MUC5AC* **(C)** mRNAs were quantitatively  
84 measured by Taqman assays. IL1 $\beta$  and IL13 were both administrated at 1ng/ml from the basolateral side  
85 in media; diluted SAMS (containing 1ng/ml IL1 $\beta$  by 1:40 dilution of undiluted SAMS stock) was added  
86 on the apical side of HBE cells. Dot-line plots present values of code-matched cultures treated with  
87 controls (vehicle, PBS) or cytokines and SAMS. The data were analyzed with one-way ANOVA followed  
88 by Dunnett's test in control (PBS), IL1 $\beta$  and IL13 treatment groups (n=16 codes of non-CF and n=15  
89 codes CF HBE cells with n=1 culture/code/treatment were used). Data were analyzed with two-way  
90 ANOVA followed by Sidak correction in PBS vs. SAMS treatment group (n=5 codes of non-CF and n=5  
91 codes of CF HBE cells with n=2 cultures/code/treatment were used). One code means the cells obtained  
92 from one individual donor lung.  
93

# Supplementary Figure 5

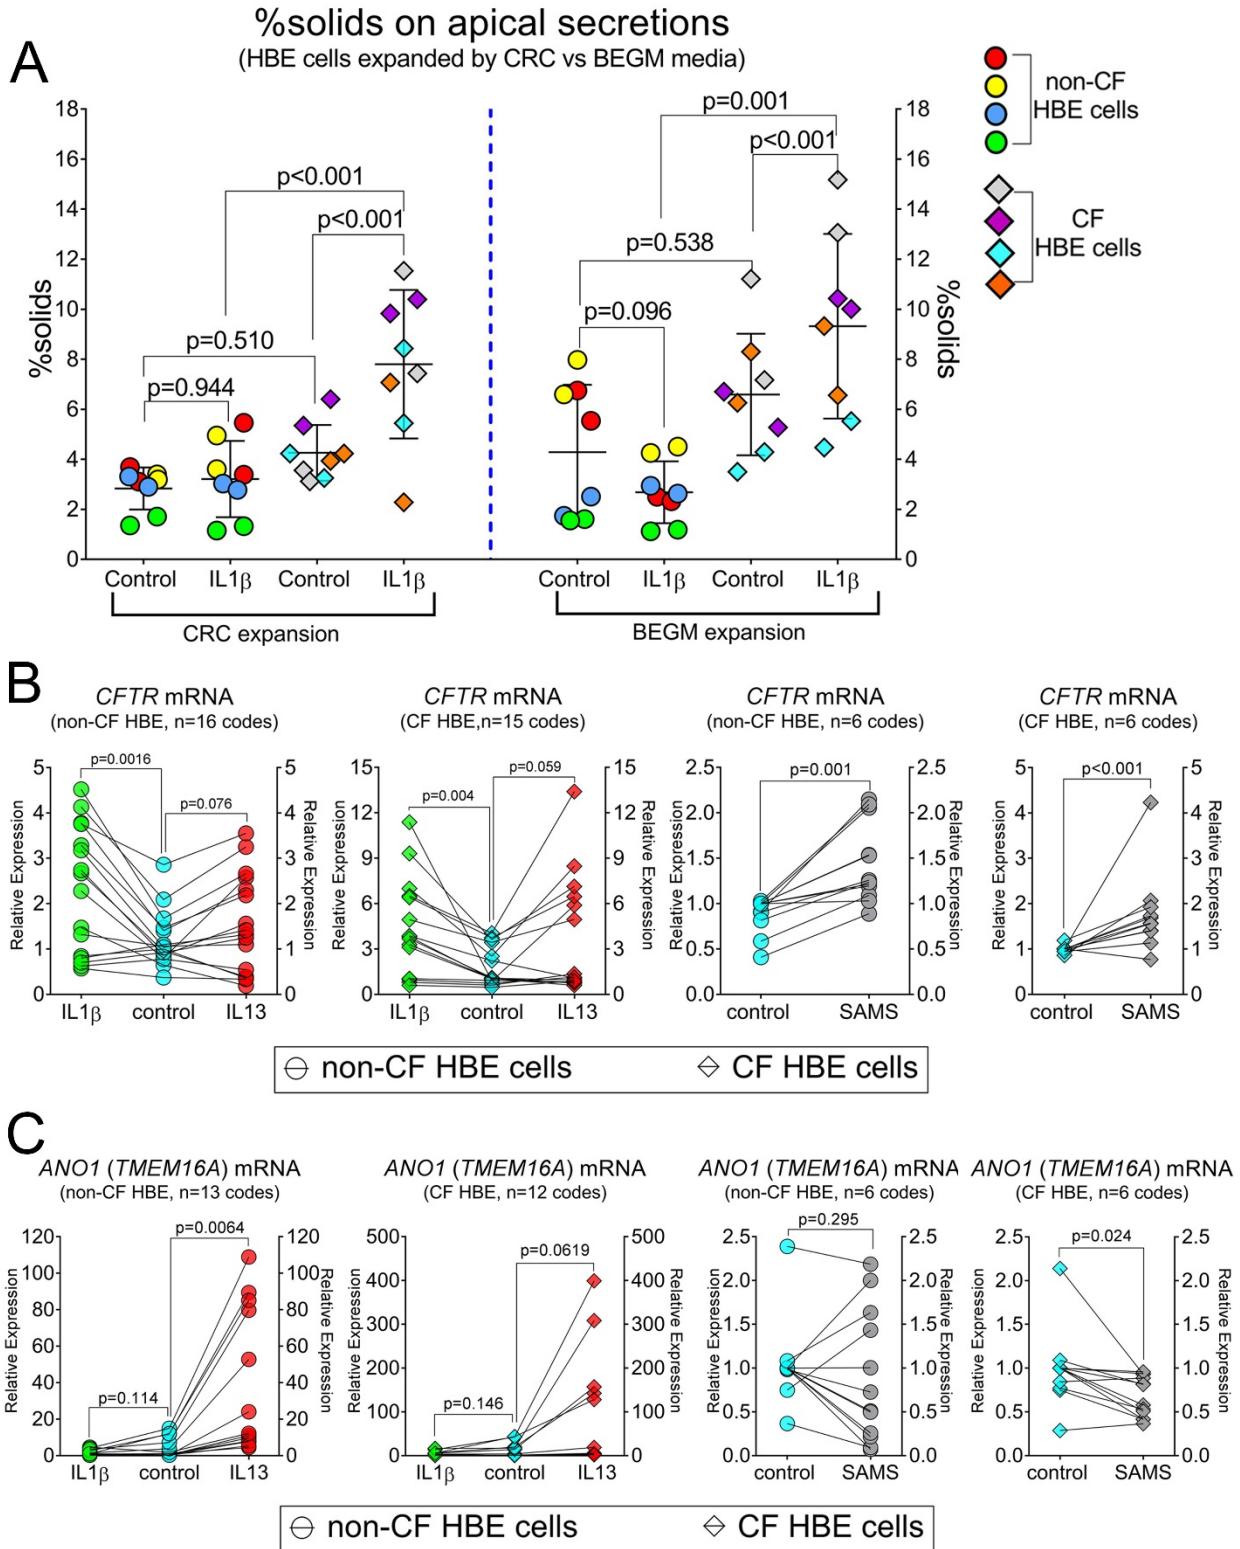

95 **Supplementary Figure 5: IL1 $\beta$  increased mucus concentration in CF HBE cells in both CRC or**  
96 **BEGM expansion protocols. IL1 $\beta$  and SAMS increased *CFTR* mRNA, whereas IL13 induced**  
97 ***TMEM16A* mRNA in non-CF and CF HBE cells. (A)** n=4 non-CF, non-smoker codes of HBE cells,  
98 and n=4 codes of CF HBE cells (all  $\Delta$ F508 homozygous mutants) were tested for mucin concentration at  
99 baseline and after IL1 $\beta$  exposure of HBE cell cultured by conditional reprogrammed culture (CRC)  
100 methods or conventional BEGM expansion method. After one week of amplification in CRC or BEGM  
101 medium, cells were then seeded onto transwells, and cultured for 4 weeks to allow full differentiation  
102 under air-liquid interface (ALI) culture conditions using the exact same culture condition/protocol. The  
103 IL1 $\beta$  exposure was started at the 5th week and continued for one week without apical washing during this  
104 week before %solids measurements. Two independent cultures of each code/condition were measured for  
105 %solids. Each color indicates measurements obtained from the same code. Data represent means $\pm$ SD, and  
106 were analyzed by linear mixed-effects model with subject identification number as random intercept  
107 variable. The dot-line plots show *CFTR* mRNA (B) and *TMEM16A* (*ANO1*) mRNA (C) after exposure  
108 with control, IL1 $\beta$  or IL13, or PBS vs. SAMS in non-CF and CF HBE cells. IL1 $\beta$ , IL13 and SAMS  
109 administration protocol and data analysis were performed same as described in Supplementary Figure 4  
110 B,C.  
111

# Supplementary Figure 6

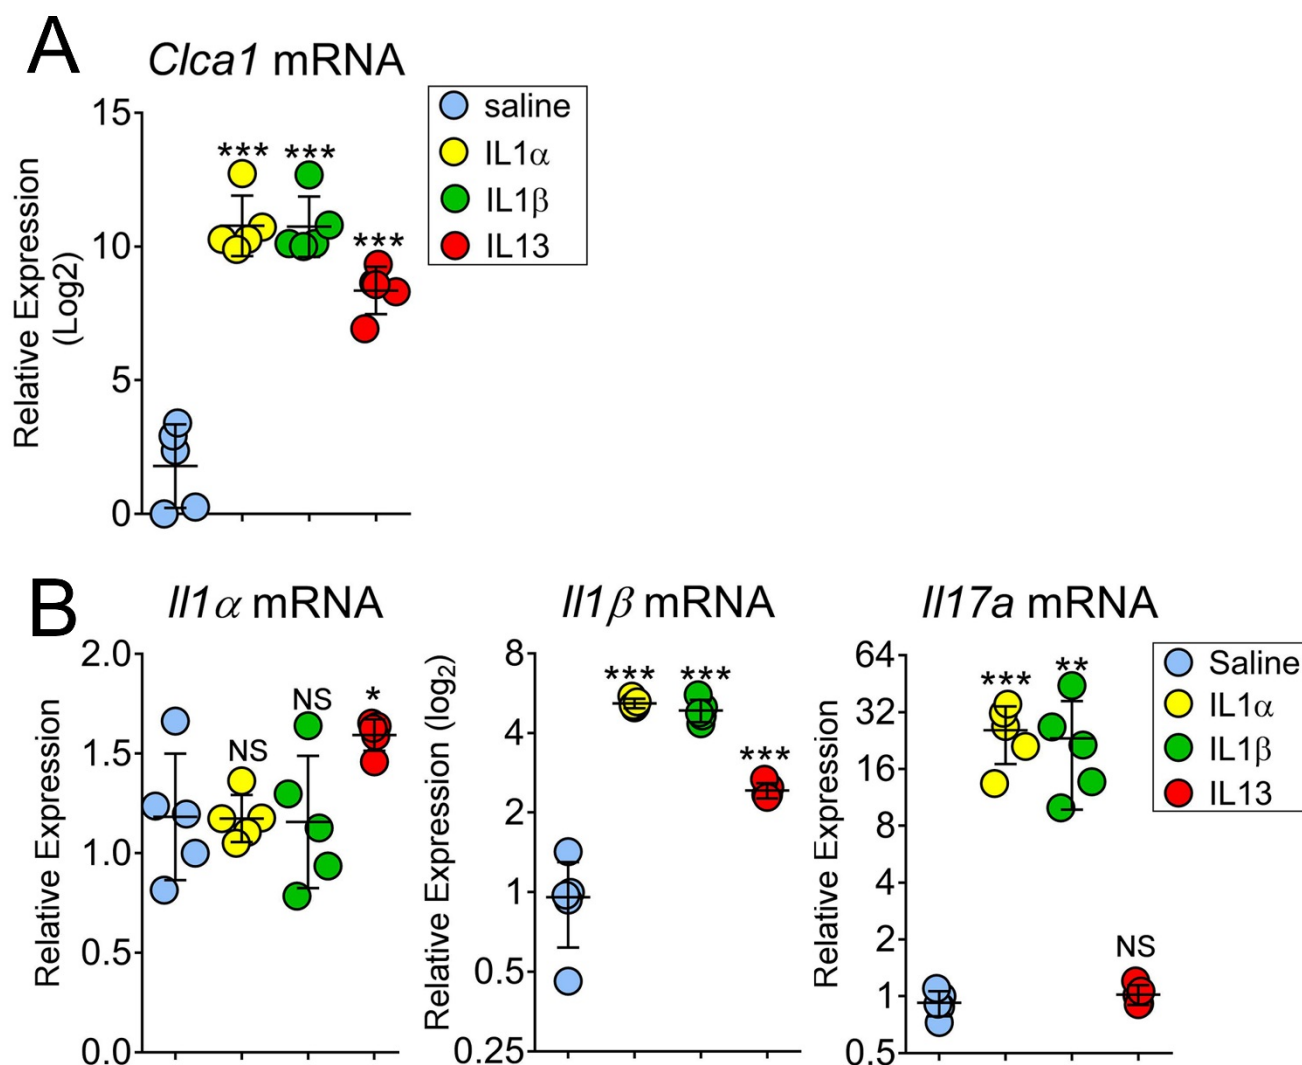

112

113 **Supplementary Figure 6: Intratracheal instillation of IL1 $\alpha$  and IL1 $\beta$  cytokines induces expression**  
 114 **of *Clca1* and endogenous *Il1b* and *Il17a* mRNAs, whereas administration of IL13 cytokine induces**  
 115 **expression of *Clca1* and endogenous *Il1a* and *Il1b* mRNAs in the whole lung.** Wild type adult (6 weeks  
 116 old) female C57/B6J mice were exposed with sterile saline, IL1 $\alpha$ , IL1 $\beta$  and IL13 via intratracheal  
 117 instillation. *Clca1* (A), *Il1a*, *Il1b* and *Il17a* (B) mRNAs were quantitatively measured by Taqman assays.  
 118 Scatter-plot graphs present means $\pm$ SD, and data were analyzed with one-way ANOVA followed by  
 119 Dunnett's test. N=5 mice/treatment group were used to perform cytokine exposures. \*P<0.05; \*\*P<0.01;  
 120 \*\*\*P<0.001 compared to saline control group, NS=not significant.

# Supplementary Figure 7

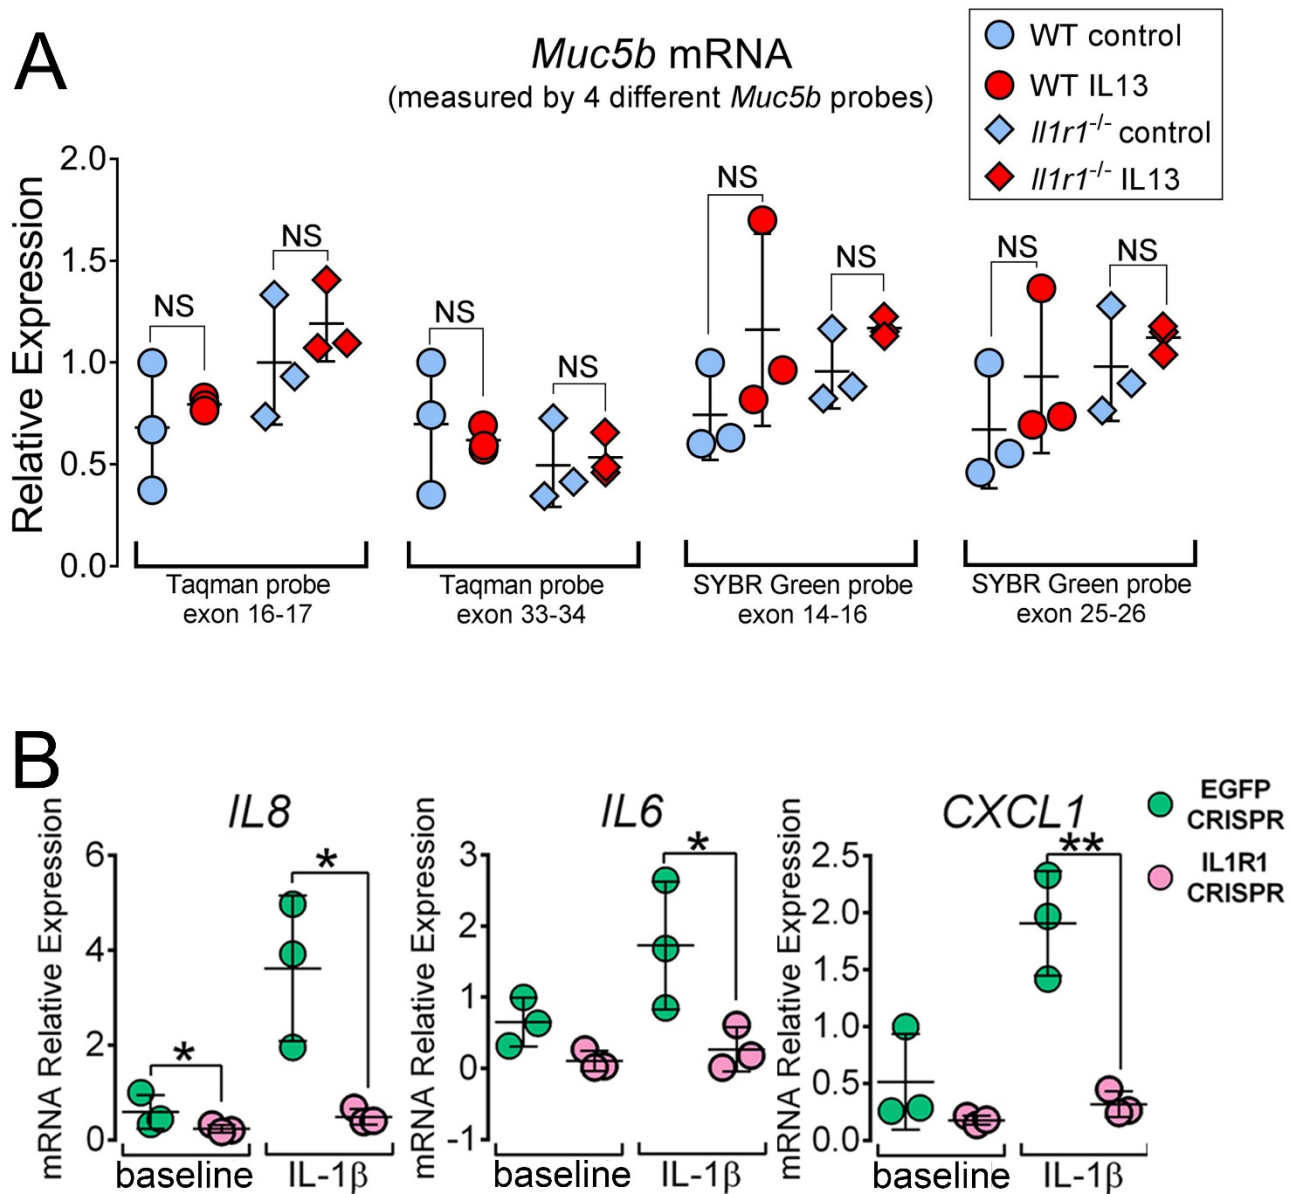

121

122 **Supplementary Figure 7: IL13 does not suppresses *Muc5b* mRNA in mouse tracheal epithelial cells**  
 123 **(mTEC) in vitro; IL1R1 CRISPR-Cas9 inhibits IL1β-induced *IL8*, *IL6* and *CXCL1* mRNAs in non-**  
 124 **CF HBE cells.** mTEC isolated from wild type and *Il1r1*<sup>-/-</sup> mice were cultured under ALI conditions for 3  
 125 weeks to allow full differentiation prior to exposure to murine recombinant cytokine IL13. They were then  
 126 exposed to murine recombinant IL13 for one week from the basolateral side in media (at 10 ng/ml). mRNA

127 expression of *Muc5b* was measured by quantitative RT-PCR with n=4 different probes detecting different  
128 exon-regions of the mouse *Muc5b* gene (see Supplementary Materials-primers/probes table for probes  
129 information). N=3 independent mTEC cultures/treatment/genotype were used for measurements. Scatter  
130 plots present mean±SD, and data were analyzed with 2-tailed unpaired t test. NS=not significant. **(B)**  
131 mRNA expression of *IL8*, *IL6* and *CXCL1* was measured quantitatively by Taqman assays in HBE cells  
132 transduced with control (EGFP) or IL1R1 CRISPR lentiviruses followed by exposure with IL1β (10ng/ml  
133 from basolateral in media) for 3 days. Graphs present mean±SD, and data were analyzed with 2-tailed  
134 paired t test with non-CF HBE cells from 3 donors. \*P<0.05; \*\*P<0.01 compared to EGFP CRISPR  
135 groups.

# Supplementary Figure 8

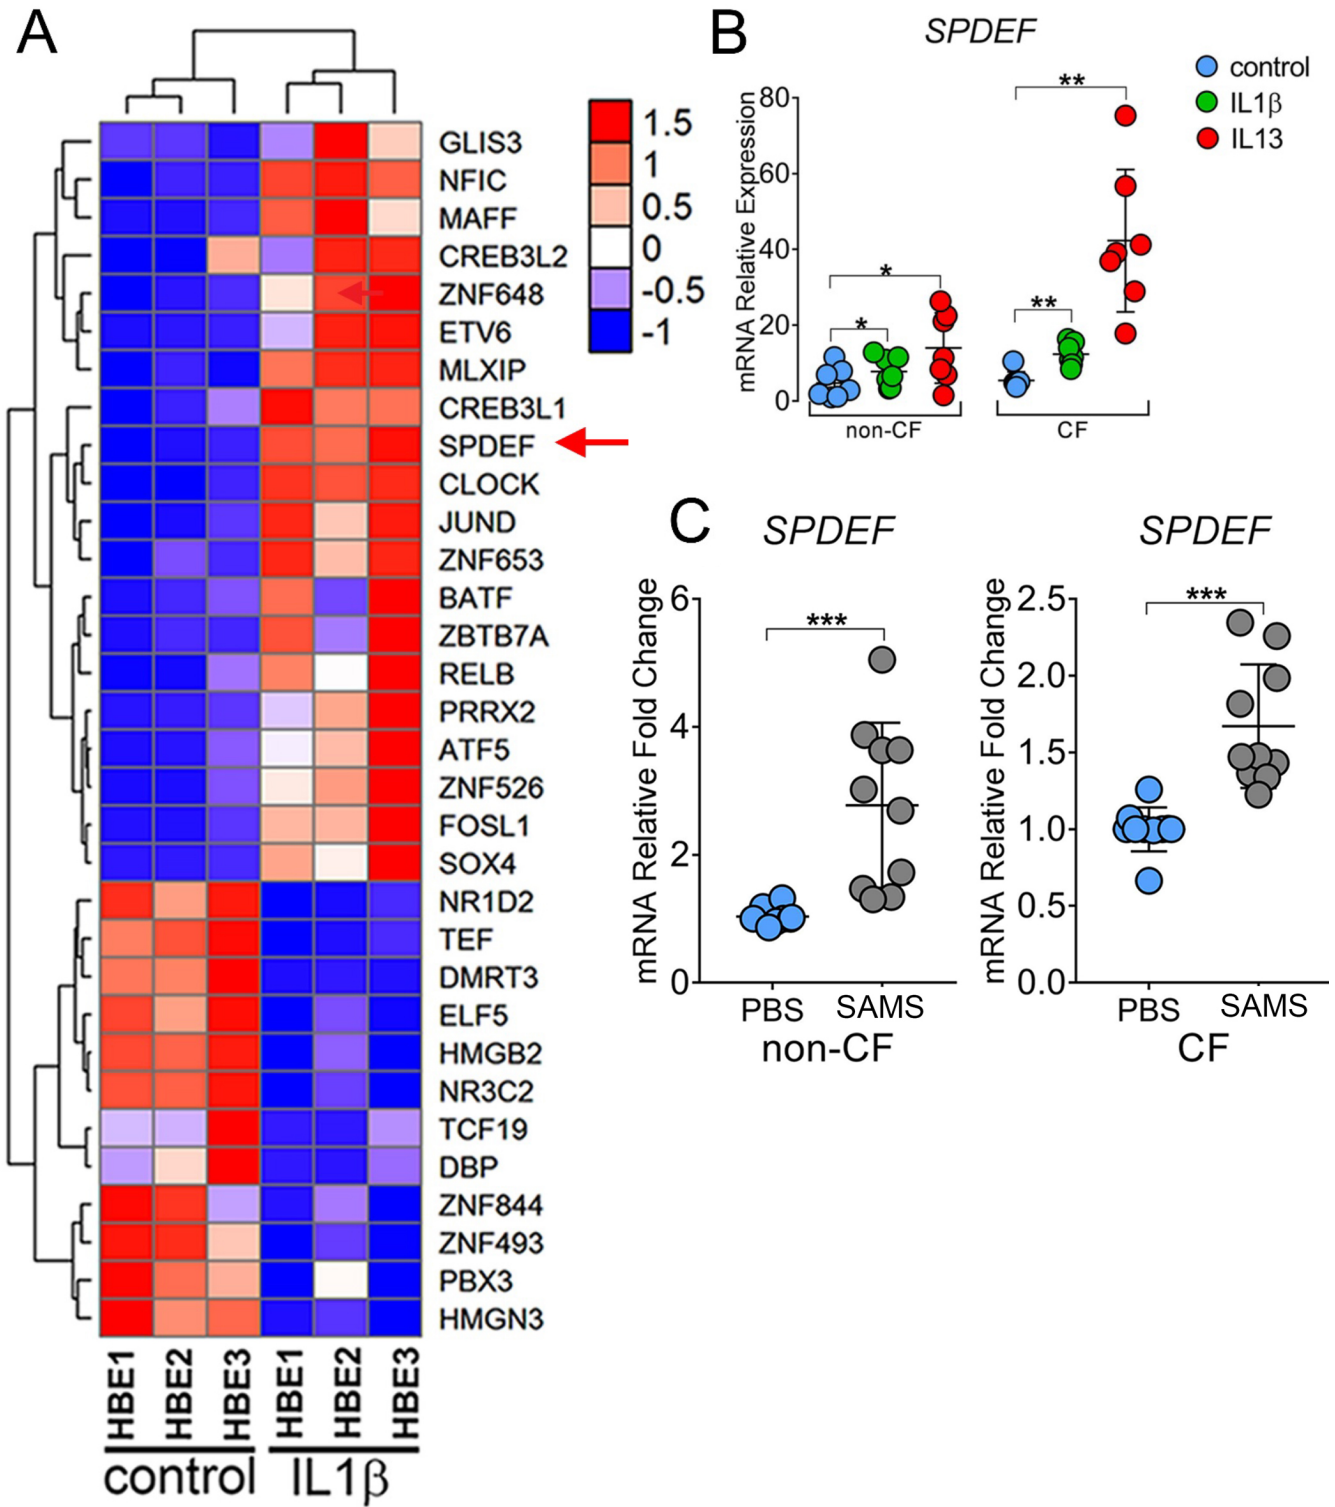



137 **Supplementary Figure 8: IL1 $\beta$  induces *SPDEF* mRNA expression in both non-CF and CF HBE**  
138 **cells. (A)** A heatmap shows induced (pink, orange to red color) and suppressed (purple to dark blue)  
139 transcription factors in n=3 codes of non-CF HBE cells after 24 hours of IL1 $\beta$  exposure (10 ng/ml in  
140 media from basolateral side). The red arrow points out SPDEF as one of the upregulated transcription  
141 factors. **(B, C)** *SPDEF* mRNA expression was quantitatively measured in non-CF and CF HBE cells  
142 following IL1 $\beta$ , IL13 **(B)** and SAMS **(C)** exposure for 1 week by Taqman assays. Graphs present  
143 mean $\pm$ SD. Data were analyzed with one-way ANOVA followed by Dunnett test in control, IL1 $\beta$  and IL13  
144 treatment group (n=7 codes of non-CF HBE cells with n=1 culture/code/treatment were used). Data were  
145 analyzed with two-way ANOVA followed by Sidak correction in PBS vs. SAMS treatment group (n=5  
146 codes of non-CF HBE cells with n=2 independent cultures/code/treatment were used). \*P<0.05;  
147 \*\*P<0.01; \*\*\*P<0.001 compared to control or PBS groups. One code means the cells obtained from one  
148 individual donor lung.  
149

# Supplementary Figure 9

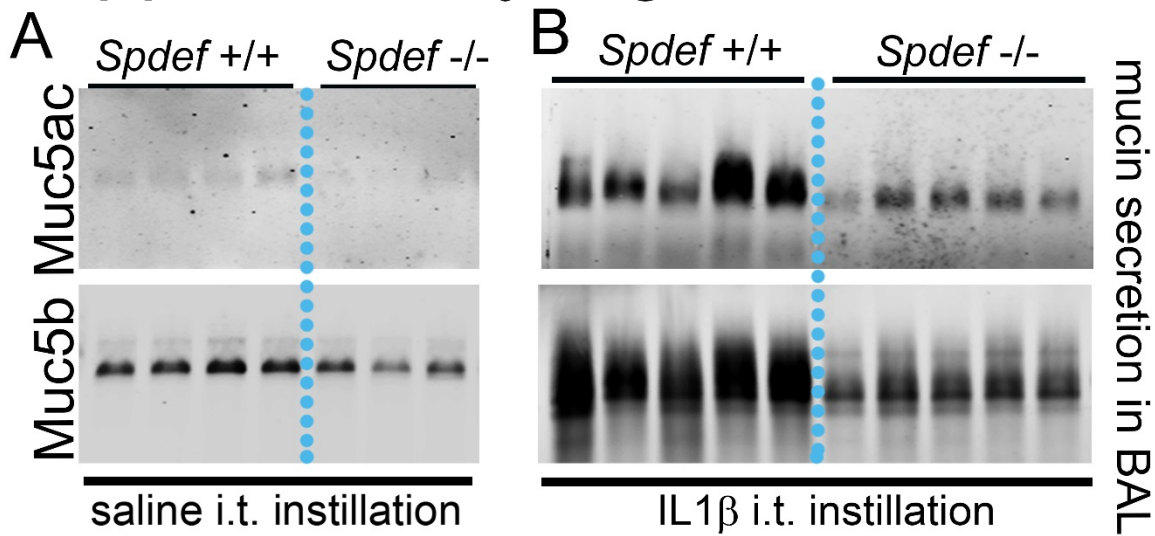

150

151 **Supplementary Figure 9: *Spdef* is required for IL1β-induced Muc5ac and Muc5b protein secretion**  
152 **from murine airways in vivo.** (A, B) Adult (6-week-old) wild type (*Spdef*<sup>+/+</sup>, n=4 for saline, and n=5 for  
153 IL1β exposure) and *Spdef*-deficient (*Spdef*<sup>-/-</sup>, n=3 for saline, and n=5 for IL1β exposure) mice were  
154 exposed to saline (A) or IL1β (B) via intratracheal instillation. Bronchoalveolar lavage (BAL) was  
155 collected from the whole lung and subjected to mucin agarose western blot to detect secreted Muc5ac and  
156 Muc5b mucin proteins in the BAL.

157

# Supplementary Figure 10

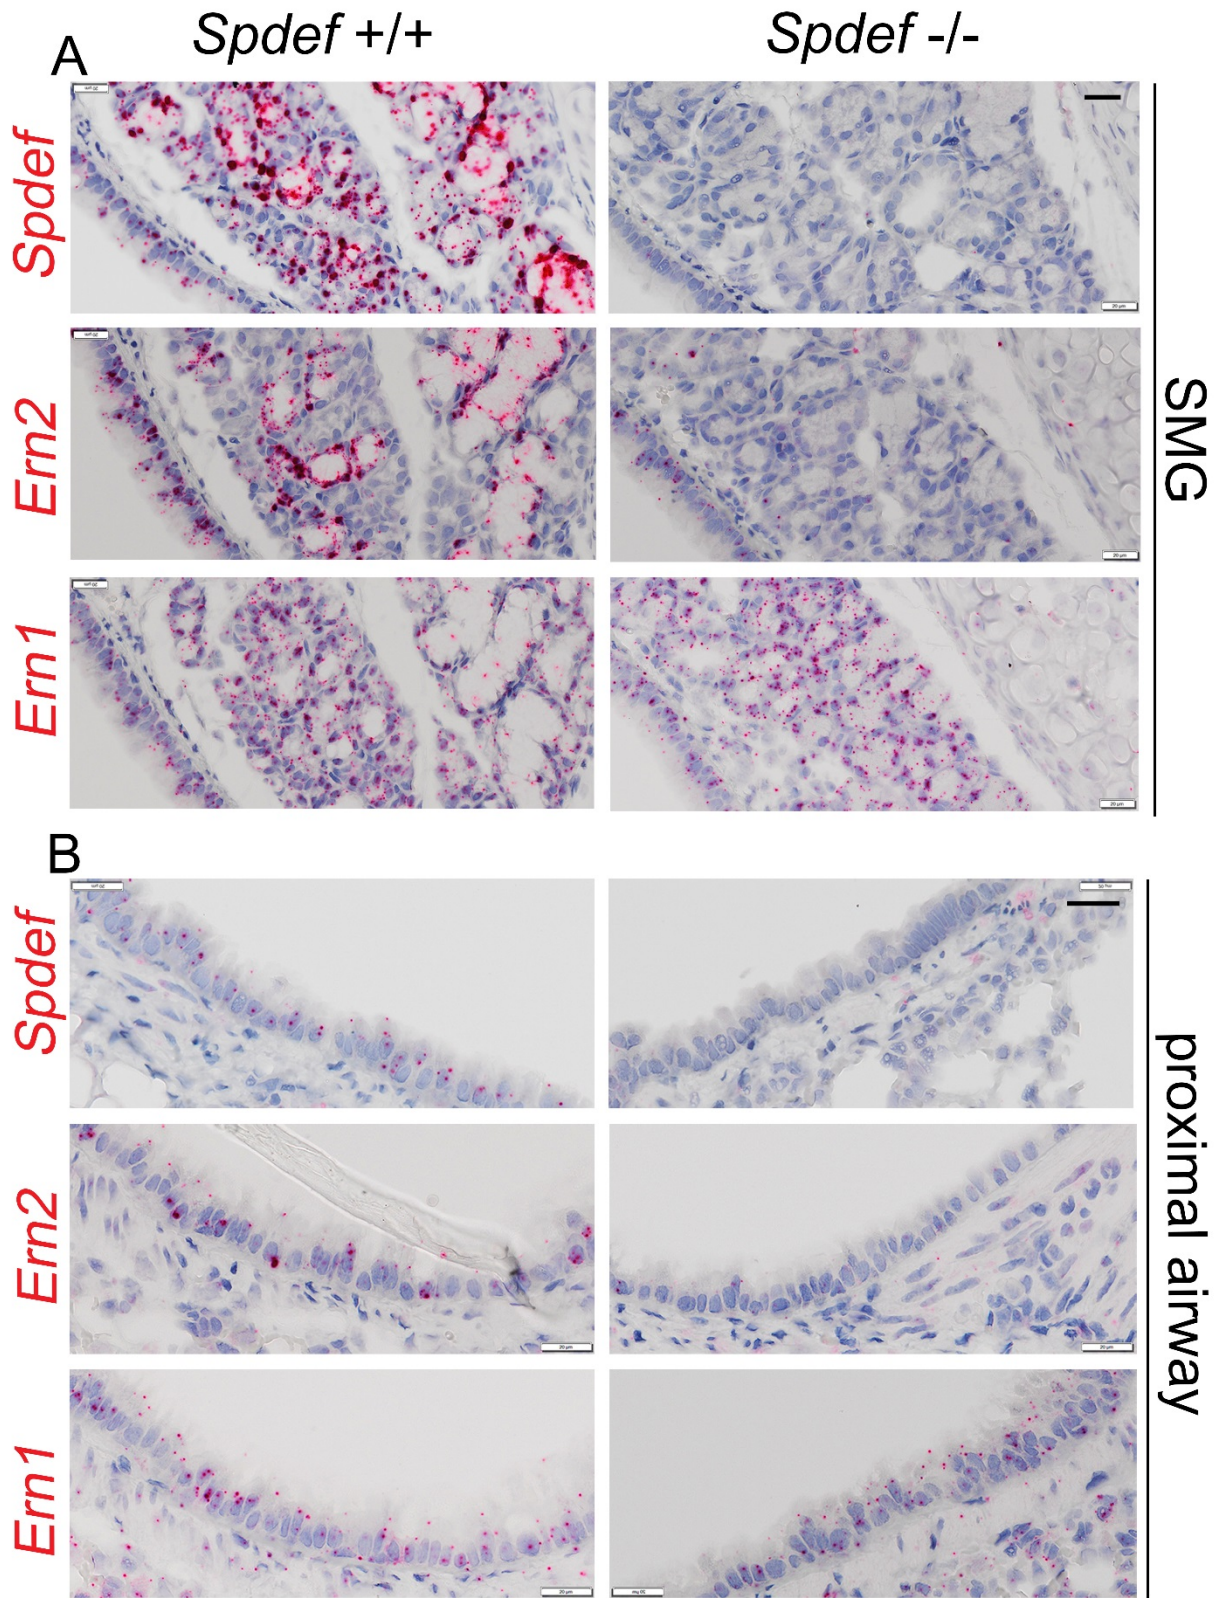

159 **Supplementary Figure 10: mRNA expression of *Spdef*, *Ern2* and *Ern1* in SMGs and proximal**  
160 **intrapulmonary airways in wild type and *Spdef*-deficient adult mice. (A,B)** Basal expression of *Spdef*,  
161 *Ern2* and *Ern1* mRNAs was detected by Basescope and RNAscope red assays in SMGs (A) and in  
162 superficial epithelia lining the proximal airways (B) of 6-week-old wild type (*Spdef*<sup>+/+</sup>) and *Spdef*-  
163 deficient (*Spdef*<sup>-/-</sup>) mice. Micrographs are representative of n=3 mice/genotype. Scale bar is 20μm in both  
164 panels.

165

166

# Supplementary Figure 11

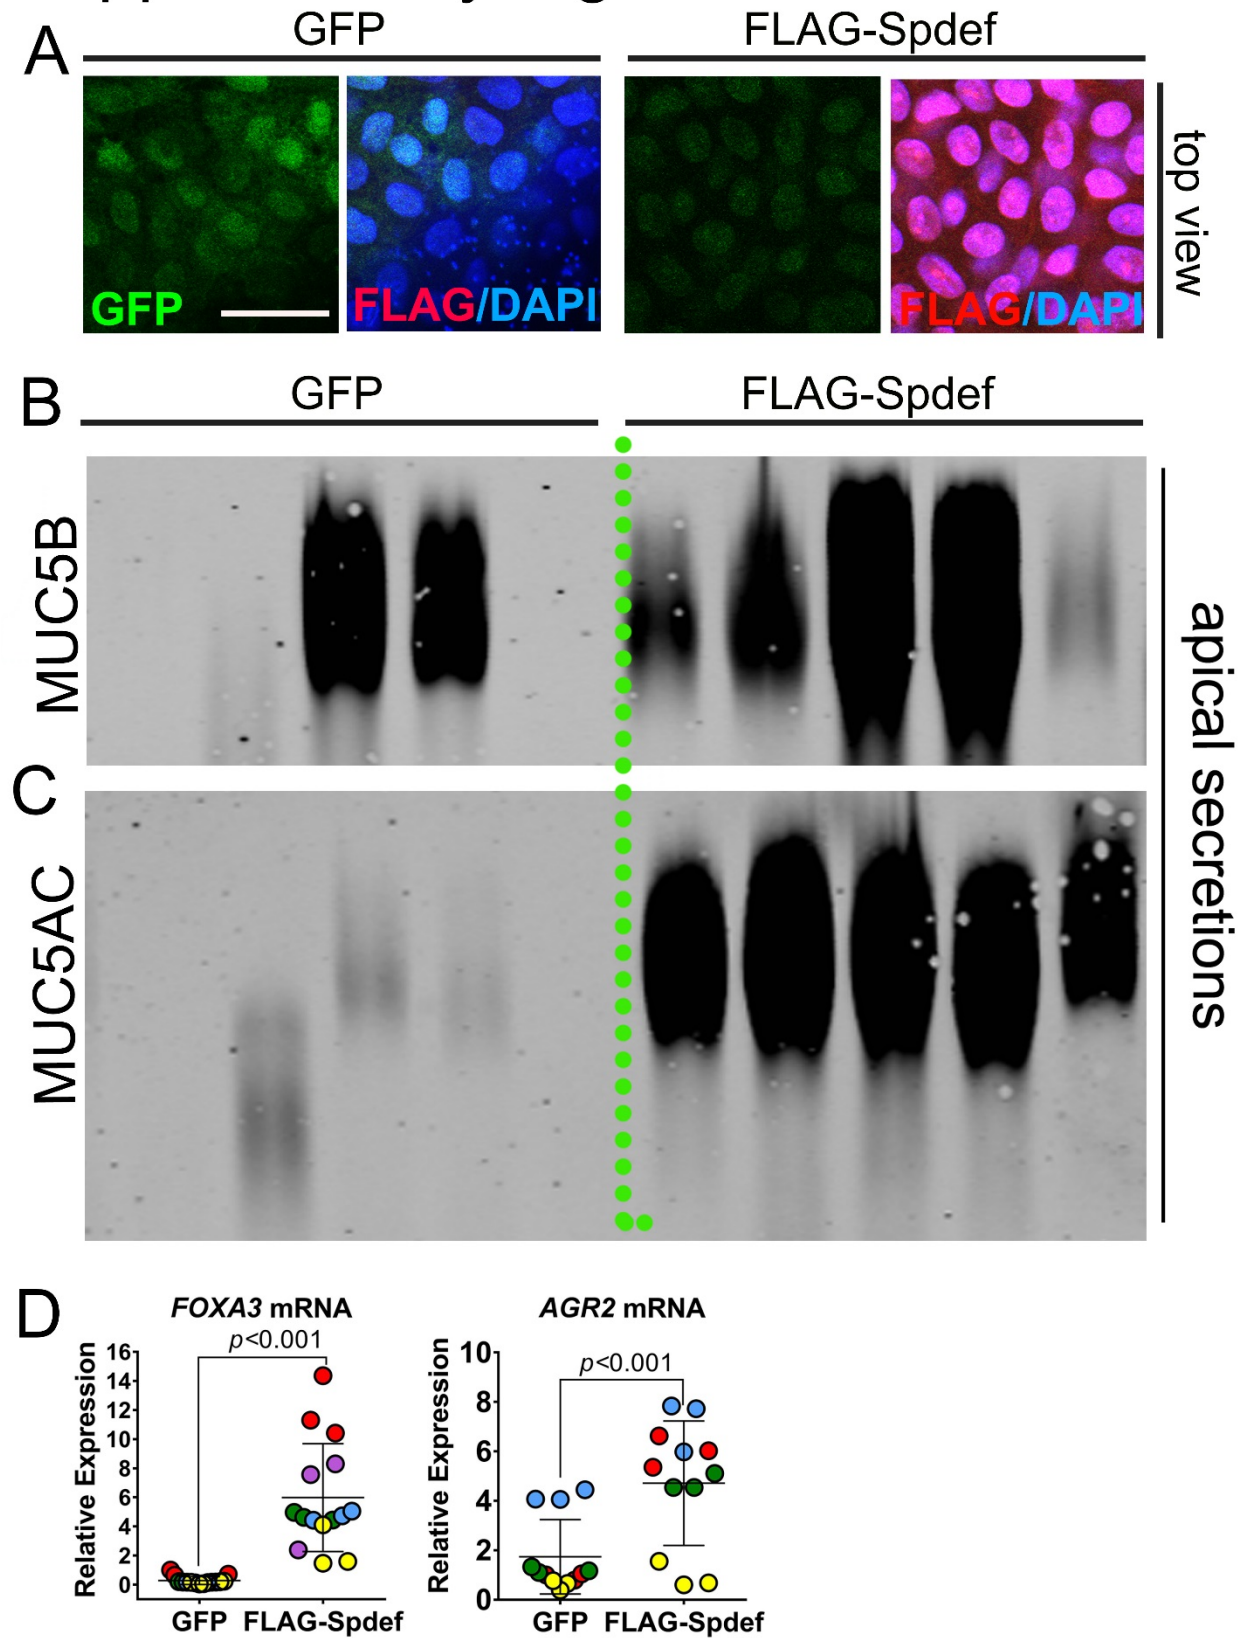

168 **Supplementary Figure 11: Spdef induces MUC5B and MUC5AC protein secretion in HBE cells.**  
169 Non-CF HBE cells were transduced with lentivirus expressing GFP (control) or FLAG-Spdef (FLAG tag  
170 was fused at N-terminus of Spdef protein) and cultured under air-liquid interface conditions for 1 week.  
171 (A) Expression of GFP and FLAG-Spdef fusion protein was detected by immunofluorescent staining with  
172 GFP and FLAG antibodies, counter stained with DAPI to show nuclei. Micrographs are representative of  
173 cultures from 3 codes of HBE cells. MUC5B (B) and MUC5AC (C) protein secretions from the 5 codes  
174 of non-CF HBE cells expressing GFP or FLAG-Spdef were detected by mucin agarose gel western blot.  
175 (D) Non-CF HBE cells were infected with lentiviruses expressing GFP (control) or FLAG-Spdef and  
176 cultured under ALI conditions for 1 week. *FOXA3* and *AGR2* mRNA levels were quantitatively measured  
177 by Taqman assays. Data were analyzed with 2 way ANOVA followed by Sidak correction. Non-CF HBE  
178 cells from n=4-5 donor lungs were used for lentivirus infection, and n=3 independent cultures of each  
179 code were used for performing gene expression assays. The cultures from the same code were labeled  
180 with the same color dots that were infected with GFP or FLAG-Spdef lentivirus. One code means the cells  
181 obtained from one individual donor lung. Scale bar in (A)=10 $\mu$ m.

182

# Supplementary Figure 12

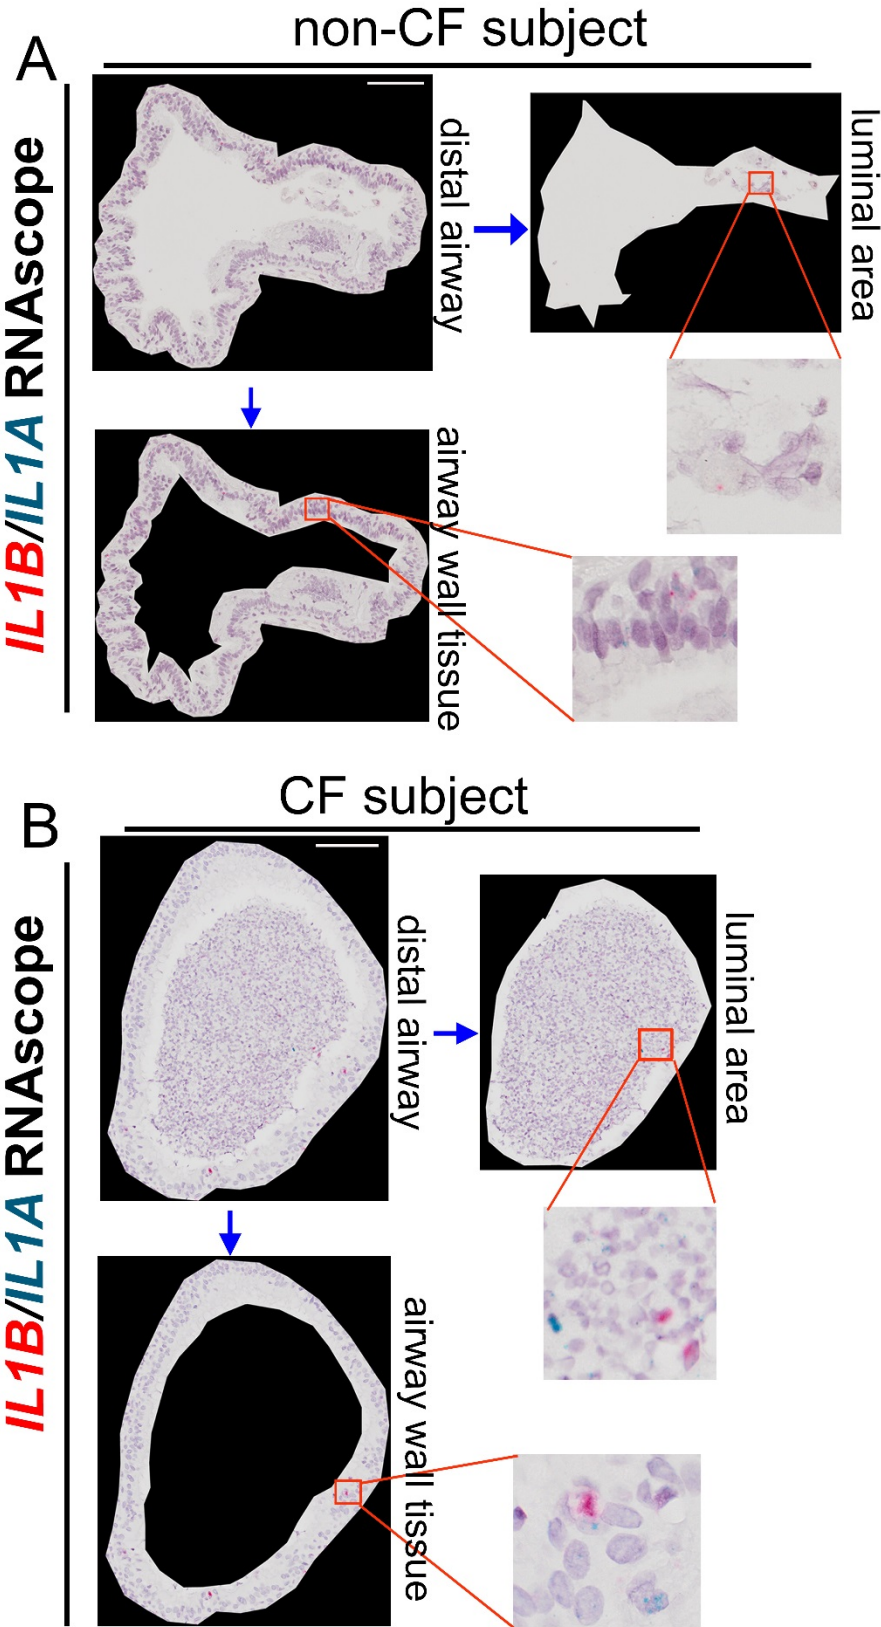

184 **Supplementary Figure 12: Morphometry of RNAscope signals in the lung tissue.** Representatives of  
185 airway epithelial layer tissues and luminal areas were selected for morphometric analyses of *IL1B/IL1A*  
186 RNAscope signals from non-CF (**A**) and CF (**B**) subjects. The cells in the luminal areas and airway  
187 epithelial layer tissues are shown in high power view from the regions selected. Scale bar=100µm.



# Supplementary Figure 13

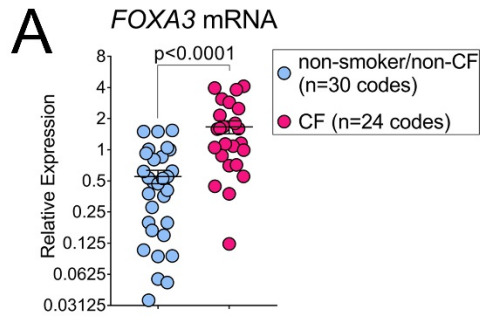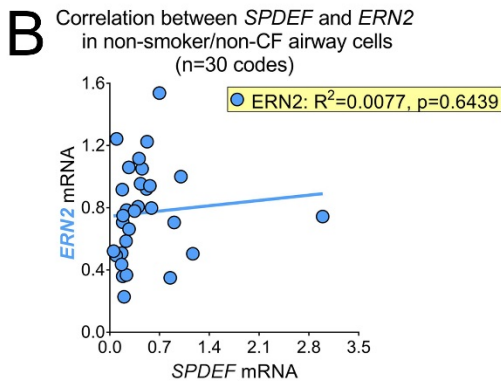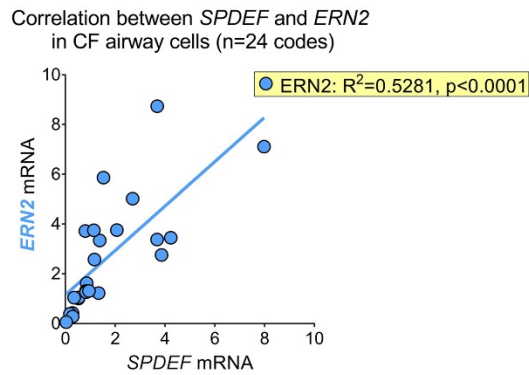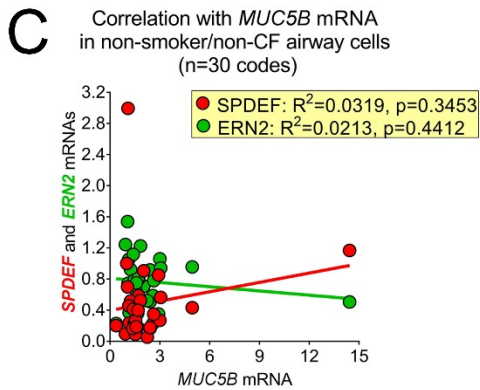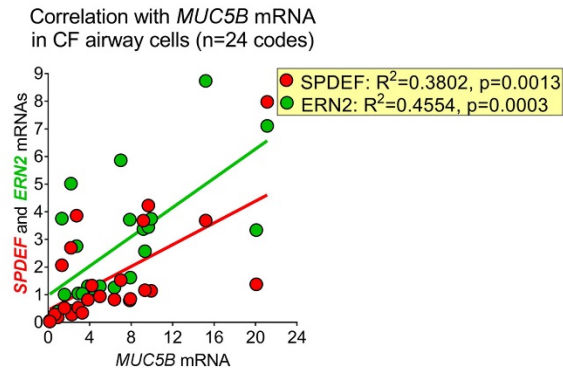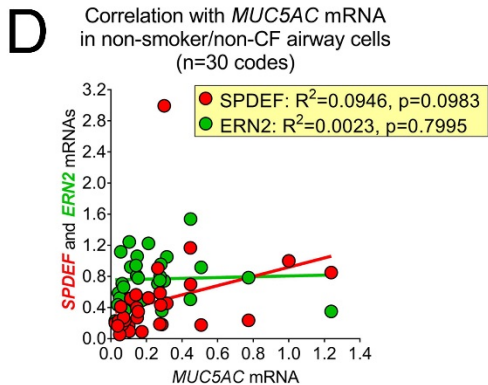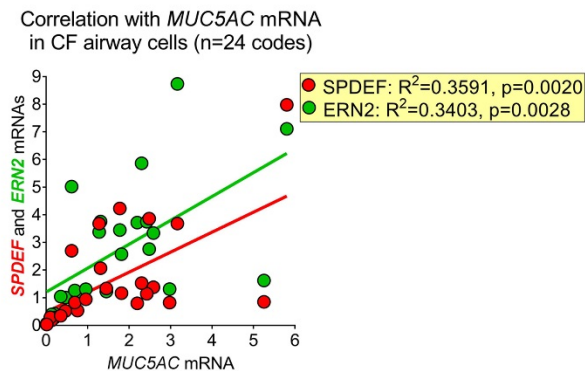

189 **Supplementary Figure 13: Increased expression of *FOXA3* mRNAs in CF airway cells. *SPDEF* and**  
190 ***ERN2* mRNAs are associated with higher level expression of *MUC5B* and *MUC5AC* mRNAs in the**  
191 **freshly isolated airway epithelia from CF compared to non-smoker/non-CF subjects. (A)** *SPDEF*-  
192 regulated gene *FOXA3* mRNA was quantitatively measured by Taqman assays (normalized to endogenous  
193 *GAPDH* mRNA) from the airway epithelial cells (passage #0) freshly isolated from non-CF, non-smoker  
194 donors (control, n=30 codes) and CF donors (n=24codes). Scatter plots present means±SE, and data were  
195 analyzed with 2-tailed unpaired Mann-Whitney test. The correlations between *SPDEF* and *ERN2* (B)  
196 mRNAs and the correlation of their expression with *MUC5B* (C) and *MUC5AC* (D) mRNAs in freshly  
197 isolated non-smoker/non-CF (control, n=30 codes) and CF (n=24 codes) airway cells were analyzed by  
198 linear regression test. (endogenous *GAPDH* mRNA was used for the normalization of gene expression)  
199 The R<sup>2</sup> and p values of the tested genes were annotated in the panel (B-D). One code means the cells  
200 obtained from one individual donor lung.

201

# Supplementary Figure 14

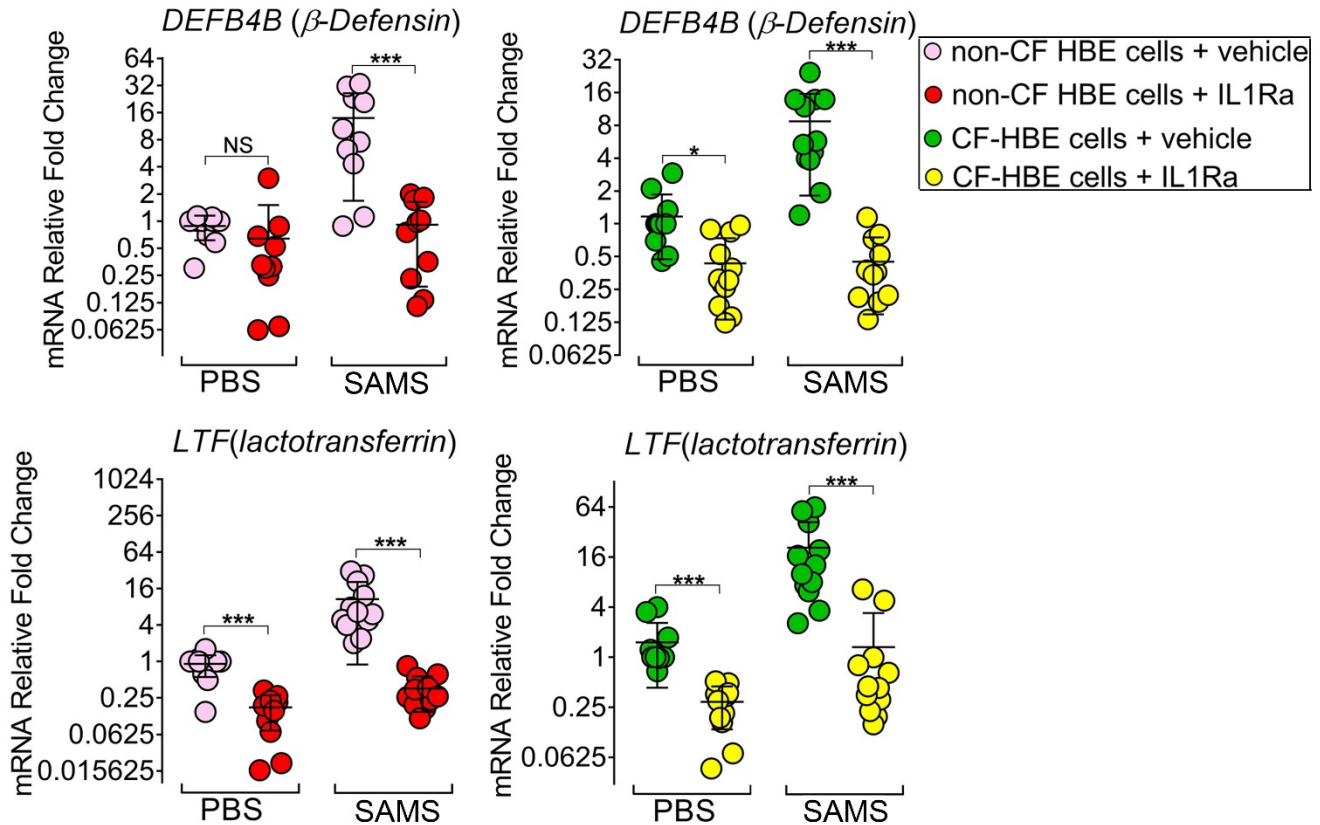

202

203 **Supplementary Figure 14: IL1Ra inhibits SAMS-induced expression of innate host defense**  
 204 **molecules in both non-CF and CF HBE cells.** Fully differentiated non-CF and CF HBE cells were  
 205 pretreated with vehicle (PBS) or IL1Ra (at 2 $\mu$ g/ml on the apical side, and 400ng/ml on the basolateral  
 206 side) for 24 hours prior to exposure to SAMS (1:40 dilution to reach 1ng/ml of IL1 $\beta$  concentration in  
 207 SAMS). SAMS+IL1Ra were compared with the control groups that were treated with PBS and IL1Ra that  
 208 were treated for 3 days. Expression of innate host defense genes  $\beta$ -Defensin 2 (*DEFB4B*) and  
 209 *lactotransferrin* (*LTF*) was quantitatively measured by Taqman assays. Graph present means $\pm$ SD with  
 210 two cultures of n=5 codes of non-CF and n=5 codes of CF HBE cells. Data were analyzed with 2-way  
 211 ANOVA followed by Sidak correction. \*P<0.05; \*\*P<0.01; \*\*\*P<0.001 compared to vehicle treated  
 212 groups; NS=not significant. One code means the cells obtained from one individual donor lung.

213

214

## II: Supplementary Materials and Methods:

215

216 ***Mouse tracheal epithelial cells (mTEC) culture:*** mTEC isolation and culturing followed the procedure  
217 previously described (1) with a modified differentiation protocol. To induce differentiation, mTEC were  
218 cultured with PluriQ differentiation media (Stem Cell, Inc) on milli-cells (Millipore, PIMC01250) for 3  
219 weeks at the air-liquid interface (ALI) to allow full differentiation. Recombinant mouse IL1 $\alpha$  (#400-ML-  
220 005), IL1 $\beta$  (#401-ML-005), IL13 (#413-ML-005) and IL17a (#7956-ML-025) cytokines were ordered  
221 from R&D System (Minneapolis, MN) and administered in differentiation media from basolateral side at  
222 concentration of 10ng/ml for 1 week.

223 ***Preparation of the supernatants of airway mucopurulent secretions (SAMS) from CF airways:***  
224 Mucopurulent material was harvested from the airways of excised human CF lungs and provided by the  
225 Tissue Procurement and Cell Culture Core at the UNC at Chapel Hill. The collected material was then  
226 centrifuged at 100,000 rpm (60 min, 4 °C), and the supernatant from the mucopurulent material was  
227 sterilized by filtration through a 0.2  $\mu$ m filter and frozen at -80 °C, as previously described (2). Because  
228 of the limited volumes of SAMS per patient and the large number of experiments included in the present  
229 study, the undiluted stock SAMS was pooled from 8 CF lungs (described in Figure 1B) to ensure sufficient  
230 material for the study.

231 ***ELISA determination of IL1 $\alpha$  and IL1 $\beta$  concentration in SAMS:*** A pooled SAMS sample collected from  
232 8 CF donors was diluted 1:100, 1:10, 1:2 with sterile PBS. The diluted pooled SAMS and undiluted SAMS  
233 collected from individual CF donor lungs (3) were used to for determination and calculation of IL1 $\alpha$  and  
234 IL1 $\beta$  concentration in each CF airways using the IL1-alpha and IL1-beta Human ELISA kits (BMS243-2  
235 and KHC0012, ThermoFisher) following manufacture instruction.

236 ***Cell and lung tissue collection, total RNA isolation and cDNA preparation:*** The left lobe of the mouse  
237 lung was surgically excised after euthanasia and homogenized immediately (Minilys homogenizer, Bertin,  
238 Rockville, MD) in Trizol reagent. Freshly isolated HBE cells were collected from airway tissue of non-  
239 smoker/non-CF and CF donors right after enzymatic digestion and physical scraping (provide by Tissue  
240 Procurement and Cell Core of Marsico Lung Institute, UNC at Chapel Hill), and immediately lysed with  
241 Trizol for total RNA purification. The HBE cells growing on the transwell membrane were collected by  
242 excision of the whole membrane together with the cells using razor blade, and lysed in Trizol at 37°C  
243 shaker (250rpm) for 30 minutes. Total RNA was purified from the Trizol lysates using the Direct-Zol  
244 RNA miniprep Kit (cat#R2051, Zymo Research, Irvine, CA), and examined by NanoDrop One  
245 Spectrophotometer (ThermoFisher) for its quality and quantity. 1µg of total RNA was reverse transcribed  
246 to cDNA by Verso cDNA Kit (cat#AB-1453/B, Thermo Fisher Scientific, Waltham, MA) at 42°C for one  
247 hour. Quantitative RT-PCR was performed using Taqman probes (Applied BioSystems, Foster City, CA),  
248 or SYBR green primer sets with SsoAdvanced Universal Probes Supermix, Ssoadvanced Universal  
249 SYBR green Supermix, (cat#1725275, 1725285, Bio-Rad, Hercules, CA) respectively, on QuantStudio6  
250 Real-time PCR machine (Applied Biosystem). The house-keeping gene used for normalization of gene  
251 expression for in vitro cultured HBE cells was TATA-binding protein (*TBP*) gene for all the quantitative  
252 measurement unless otherwise specified in the figure legend. The house-keeping gene used for  
253 normalization of gene expression of mouse lung in vivo was glyceraldehyde 3-phosphate dehydrogenase  
254 (*Gapdh*). See primers/probes table for detailed information.

255 ***Immunohistochemistry, AB-PAS staining and confocal microscopy:*** The surgically excised human lung  
256 tissue was dissected from main bronchi to distal airways, lung parenchyma containing bronchi and/or  
257 bronchioles and/or terminal bronchioles, followed by fixation with 10% neutral buffered formalin for 24-  
258 36 hours in immersion and paraffin-embedding. The mouse lung was inflation fixed with 10% neutral

259 buffered formalin for 24 hours on a rocker at 4°C. The paraffin-embedded lung tissue specimens were cut  
260 at 5µm thickness to produce sections. ALI cultured HBE cells were fixed with 10% neutral-buffered  
261 formalin on transwell membrane for 1 hour at room temperature, followed by washing with PBS prior to  
262 embedding and sectioning. H&E, AB-PAS and immunohistochemical and immunofluorescent staining  
263 were performed as previous described (4, 5). GFP antibody and FLAG antibody was purchased from  
264 Abcam (ab5450) and Sigma-Aldrich (cat#F3165-2MG).

265 ***RNA in situ hybridization (RNAScope and BaseScope)***: Advanced Cell Diagnostics (ACD) designed and  
266 synthesized probes and reagent kits for RNA in situ hybridization used in this study. The probes and  
267 reagents were based on ACD proprietary RNAScope® technology which integrates probe design with  
268 signal amplification and detection to achieve single-molecule detection. All RNAScope probes consist of  
269 a series of individual oligos was called Z probes. Detailed designing information, including the template  
270 sequence (GenBank Accession#) used for designing the probe, and the starting and ending positions in  
271 the gene sequence where the probes bind, is shown in the “RNAScope and BaseScope Probe Table”. The  
272 procedure of hybridization with the probes on human and mouse tissue slides were performed following  
273 manufacturer’s manuals.

274 ***Mass spectrometry***: A 100ul aliquot of apical secretions from each HBE cells culture chronically exposed  
275 to control, IL1β or IL13 was reduced, alkylated, and digested with trypsin as previously described. The  
276 resulting peptides were analyzed by liquid chromatography-tandem mass spectrometry (Q Exa]ctive,  
277 Thermo Fisher Scientific) using data dependent analysis (6). Proteins were identified from the secretions  
278 by searching against the most current human database and quantified with Scaffold 4.4.8 (Proteome  
279 Software Inc.) using the total precursor intensity without normalization, including peptides with a  
280 minimum of 95% probability by the Scaffold Local FDR algorithm.

281 **Percentage mucus solids:** The percentage mucus solids content, an index of hydration, was calculated by  
282 measuring dry to wet weight ratio of apical secretions from HBE cells after cytokine treatment using the  
283 filter paper technique following the protocol described previously (7, 8).

284 **Mucin agarose western blot and MUC5B and MUC5AC antibodies:** MUC5AC and MUC5B agarose  
285 Western blot of mouse BAL samples was followed the protocol previously described (4, 9) to detect  
286 human and mouse mucins expression. Human MUC5AC and MUC5B protein expression in apical  
287 secretions of HBE cells was detected by human MUC5AC (10) and MUC5B (11) antibodies, while mouse  
288 Muc5ac and Muc5b protein in the whole lung BAL was detected by Muc5ac (UNC-294) and Muc5b  
289 (UNC-222) antibodies (4, 12). Western blot signal detection and densitometry analysis were performed  
290 using the Odyssey Infrared Imaging System (LI-COR Biosciences).

291 **Construction of lenti-CRISPR vectors:** Single guide RNA (sgRNA) targeting sequences (see  
292 primers/probes table) were selected using the online tool: [crispr.cos.uni-heidelberg.de](http://crispr.cos.uni-heidelberg.de), from which *IL1R1*  
293 CRISPR was predicated to target the 4<sup>th</sup> exon of the human *IL1R1* gene. The top 3 potential off-target  
294 sequences were also predicted using the same program. Cloning and generation of CRISPR/Cas9  
295 lentiviruses were followed the protocol provided by Dr. Feng Zhang's laboratory at MIT (13). The sgRNA  
296 sequence for control CRISPR vector, EGFP CRISPR that did not target mammalian genome was  
297 previously described (13).

298 **Generation of lentivirus and titration:** To generate the EGFP and *IL1R1* CRISPR-Cas9, GFP and FLAG-  
299 Spdef (14) (generously gifted by Dr. Jeffery Whitsett laboratory of Cincinnati Children's Hospital Medical  
300 Center, Cincinnati, OH) lentiviruses, the transfer plasmids were co-transfected with packaging plasmids  
301 pCMV-VSV-G and psPAX2 (cat#8454 and #12260, Addgene) in HEK293T cells (cat#CRL-3216,  
302 ATCC). After 6 hours, cell culture media was changed to D10 media, which contained DMEM with 10  
303 % fetal bovine serum with 1 % bovine serum albumin (cat#A9418-50G, Sigma-Aldrich). After continuous

304 culture for 48 hours without changing media, viral supernatants were collected and harvested by  
305 centrifugation at 4,000 rpm at 4 °C for 10 min to pellet cell debris. The supernatant was then filtered  
306 through a 0.45µm low protein binding membrane (cat#SLHP033RS, Millipore). The virus titer was  
307 determined by quantitative RT-PCR with a kit following manufacture instructions (cat#631235, Takara  
308 Bio).

309 ***Primary HBE cell culture, cytokine exposure, and lentivirus infection:*** Primary HBE cells from non-CF  
310 (obtained from donors without previously known pulmonary diseases) and CF donors (CFTR mutation  
311 genotyping verified) were cultured following the conditional reprogramed cell (CRC) culture protocol  
312 described previously (15-17) after isolation from the airways. HBE cells were maintained at an air-liquid  
313 interface (ALI). The apical surface was washed with PBS, and ALI medium (18) was replaced only in the  
314 basal compartment two-three times per week, and cells were cultured under ALI conditions for 4 weeks  
315 to allow full differentiation. Exposure with recombinant human cytokines was administrated 4 weeks after  
316 ALI culture (all cytokines were purchased from R&D system, human IL1α: #200-LA, human IL1β: #201-  
317 LB-005, human TNFα: #210-TA, human IL8: #208-IL, human IL13: #201-ILB-005, human IL17A:  
318 #7955-IL, human IL17F: #1335-IL, human IFNα: #11200-1, human IFNβ: #8499-IF, human IFNγ: #285-  
319 IF, human IFNλ1: #1598-IL, human IFNλ2: #8417-IL), and added into basolateral side of ALI media  
320 unless otherwise specified. To infect primary HBE cells with lentiviruses, 1 million P1 cells were seeded  
321 into Corning 10cm dishes coated with bovine collagen (PureCol model 5005-B; Advanced BioMatrix) in  
322 a modified CRC culture (19) media (CRCY): 750ml of DMEM (High Glucose+ Pyruvate) (Gibco #11995-  
323 065), 250ml of F12 (Gibco #11765-054), 11 ml of Pen/Strep 100x (Gibco #15140-122), 75ml of FBS  
324 (Gibco #16140-071), and the following supplements with their final concentration: Hydrocortisone  
325 (25ng/ml, H0888, Sigma), EGF (25ng/ml, #PHG0313, Invitrogen), Insulin (5µg/ml, I5500, Sigma),  
326 Amphotericin B (250ng/ml, #BP264550, Fisher), Gentamincin (10µg/ml, #15710-064, Gibco), Cholera



327 toxin (1nM, C8052, Sigma) and Y-27632 (10 $\mu$ M, ALX-270-333-M025, Enzo life Science). At 30-50%  
328 confluence (usually 2<sup>nd</sup> day after seeding in dish), HBE cells were infected with lentivirus at MOI=3 for  
329 3 hours and grown for 48 hours before passaging to another purecol coated 15cm dish and starting with  
330 (the CRISPR/Cas9 lentiviruses) or without (GFP, FLAG-Spdef lentiviruses) puromycin selection (1 $\mu$ g/ml  
331 in CRCY) at this time point. Confluent cultures were trypsinized and frozen down in liquid N<sub>2</sub>, or seeded  
332 directly into Corning Transwell in CRCY-puromycin media at the density of 250k cells/transwell. After  
333 confluence in Transwell, cells were cultured under ALI with ALI media containing 1 $\mu$ g/ml puromycin till  
334 the end of the culture.

335 ***siRNA transfection of N3T cells:*** Negative control and *SPDEF* specific siRNA (ID:# 4390843 and  
336 #S195114, Ambion) were transfected into submerge cultured N3T cells (18) (passage#12) using  
337 Lipofectamine™ RNAiMAX Transfection Reagent (#13778150, ThermoFisher) following the protocol  
338 previously described (5). Gene expression assays were performed 48 hours after siRNA transfection.

339 ***In vivo administration of cytokines and SAMS in mouse lung:*** In vivo cytokine/SAMS treatment was  
340 performed following a protocol previously described (20). Mouse recombinant cytokines IL1 $\alpha$ , IL1 $\beta$ , IL13  
341 (same as aforementioned cytokines used in mTEC differentiation were purchased from R&D), and SAMS  
342 (diluted by mixing 25 $\mu$ l undiluted pooled SAMS with 15 $\mu$ l sterile PBS) were administrated by  
343 intratracheal instillation at 1 $\mu$ g/40 $\mu$ l/mouse on day 1, repeated on day 2 and day3. Mouse lung tissue and  
344 BAL was harvested on day 6 for histology, RNA and secreted mucin protein analysis.

345 ***In vitro administration of IL1Ra:*** Non-CF and CF HBE cells were ALI cultured for 4 weeks, and washed  
346 3 times with PBS on apical side prior to treatment with IL1Ra (#280-RA-050, R&D system). Fifty  
347 microliter of IL1Ra (2 $\mu$ g/ml diluted in sterile PBS) was added on apical side, and also in ALI media  
348 (400ng/ml) for 1 day before SAMS administration to block IL1R1. After 1 day, pretreatment of IL1Ra  
349 was removed from both apical side of the HBE cells. Cells were treated with 50 $\mu$ l of SAMS+ vehicle

350 (1:40 dilution of stock SAMS to achieve 1ng/ml of IL1 $\beta$  in SAMS using sterile PBS) or 50 $\mu$ l of  
351 SAMS+IL1Ra (diluted SAMS containing 1ng/ml IL1 $\beta$  and 2 $\mu$ g/ml IL1Ra) at apical surface, and 400ng/ml  
352 IL1Ra was kept in ALI media at basolateral side for 3 days.

353 ***Morphometry of MUC5B/MUC5AC, IL1B/IL1A mRNAs in control and CF lung tissues:*** The protocol  
354 of performing morphometry studies followed the methods described by Okuda et al. (21). Briefly, all  
355 airway sections were scanned and digitized at a magnification at 60X for *MUC5B/MUC5AC, IL1B/IL1A*  
356 RNAscope using an Olympus VS120 slide scanner light microscope. For the criteria of selection of distal  
357 airways, we selected distal airways based on their sizes, regardless of staining signal intensity. We selected  
358 all the distal airways that had luminal diameter <1.5mm or the terminal airways in the non-CF (n=4  
359 donors) and CF (n=3 donors) subjects. Quantification of *MUC5B/MUC5AC* (13.5 $\pm$ 2.5 airways/non-CF  
360 subject, and 13.6 $\pm$ 6.1 airways/CF subject) and *IL1B/IL1A* (11.8 $\pm$ 3.1 airways/non-CF subject, and  
361 15.3 $\pm$ 4.2 airways/CF subject) mRNA signals in the distal airways tissues was performed following the  
362 protocol previously described (21). The length of basement membrane (BM) was measured and used for  
363 normalization of stained volumes per the formula below. The image of the target distal airway tissues,  
364 which were left after isolating the inside luminal areas and outside regions of the airway epithelial layers,  
365 was converted to a gray-scale image followed by quantification of the areas above the optimized threshold  
366 values. We evaluated the optimized threshold value by changing the threshold until the threshold (black  
367 and white) image accurately represented the red or turquoise signals of the original RNAscope-duplex  
368 images. The area above the threshold value was then measured. The volume densities of  
369 *MUC5B/MUC5AC* and *IL1B/IL1A* mRNAs in the distal airway epithelial layers were calculated as: airway  
370 epithelial layer threshold value / [(BM) (4/ $\pi$ )]. As a result, data are presented as the volume of *MUC5B*,  
371 *MUC5AC*, *IL1B* and *IL1A* mRNA per unit surface area of the basement membrane (mm<sup>3</sup>/mm<sup>2</sup>). To  
372 measure the distal airway luminal *IL1B/IL1A* staining contents, we followed the protocol previously

373 described by Burgel et al (22). We excluded all the areas except the luminal areas (see Supplementary  
374 Figure 12). We calculated the *IL1B/IL1A* luminal contents as: luminal threshold value/[ $BM^2/(4\pi)$ ]. As a  
375 result, the data are presented as the ratio of *IL1B* and *IL1A* staining contents to the total luminal volume  
376 in the airways measured. All the normalized values were then cube-root transformed (23) prior to perform  
377 statistical analyses.

378

| <b>Taqman Assay Probes</b>    |                 |
|-------------------------------|-----------------|
| <b>Probe Name</b>             | <b>Assay ID</b> |
| <i>MUC5B</i>                  | Hs00861595_m1   |
| <i>MUC5AC</i>                 | Hs01365616_m1   |
| <i>CFTR</i>                   | Hs00357011_m1   |
| <i>SCNN1A</i>                 | Hs00168906_m1   |
| <i>SCNN1B</i>                 | Hs01548617_m1   |
| <i>SCNN1G</i>                 | Hs00168918_m1   |
| <i>SPDEF</i>                  | Hs00171942_m1   |
| <i>ERN1</i>                   | Hs00980095_s1   |
| <i>ERN2</i>                   | Hs01086607_m1   |
| <i>AGR2</i>                   | Hs00982833_m1   |
| <i>CXCL8</i>                  | Hs00174103_m1   |
| <i>IL6</i>                    | Hs00174103_m1   |
| <i>CXCL1</i>                  | Hs00236937_m1   |
| <i>FOXA3</i>                  | Hs00270130_m1   |
| <i>DEFB4B</i>                 | Hs00175474_m1   |
| <i>LTF</i>                    | Hs00914334_m1   |
| <i>Muc5b</i> (exon 16-17)     | Mm00466391_m1   |
| <i>Muc5b</i> (exon 33-34)     | Mm00466407_m1   |
| <i>Muc5ac</i>                 | Mm01276718_m1   |
| <i>Spdef</i>                  | Mm00600221_m1   |
| <i>Foxa3</i>                  | Mm00494714_m1   |
| <i>Agr2</i>                   | Mm01291804_m1   |
| <i>Ern1</i>                   | Mm00470233_m1   |
| <i>Ern2</i>                   | Mm00469005_m1   |
| <i>Clca1</i> ( <i>Clca3</i> ) | Mm01320697_m1   |
| <i>Il1a</i>                   | Mm00439620_m1   |
| <i>Il1b</i>                   | Mm00434228_m1   |
| <i>Il17a</i>                  | Mm00439618_m1   |

| <b>SYBR Green quantitative RT-PCR primers</b> |                                  |                                  |
|-----------------------------------------------|----------------------------------|----------------------------------|
| <b>Primers</b>                                | <b>Forward</b>                   | <b>Reverse</b>                   |
| <b>Muc5b (exon14-16)</b>                      | 5'-CCTACCAAGGCCAGATGTGT-3'       | 5'-AAC TCC TGA GCT TTC CGT GA-3' |
| <b>Muc5b (exon25-26)</b>                      | 5'-AAA CCC TTA CCG CAA GTC CT-3' | 5'-GAC AAG CAC ACA CCC ACA TC-3' |

| <b>RNAscope and BaseScope probes</b> |             |          |                |              |             |
|--------------------------------------|-------------|----------|----------------|--------------|-------------|
| Probe Name                           | Catalog No. | ZZ pairs | Accession No.  | Target Start | Target Stop |
| Hs-MUC5B                             | 449881      | 20       | NM_002458.2    | 3599         | 4698        |
| Hs-MUC5AC-C2                         | 312891-C2   | 20       | XM_003403450.1 | 761          | 2125        |
| Hs-ERN1                              | 497331      | 20       | NM_001433.3    | 153          | 1054        |
| Hs-ERN2                              | 497231      | 20       | NM_033266.3    | 369          | 1508        |
| Mm-Muc5ac                            | 488471      | 20       | NM_010844.1    | 4071         | 5187        |
| Mm-Muc5b                             | 471991      | 20       | NM_028801.2    | 380          | 1263        |
| Mm-Ern2                              | 500431      | 20       | NM_001316689.1 | 2            | 958         |
| Mm-Ern1                              | 438031      | 20       | NM_023913.2    | 162          | 1242        |
| Mm-Spdef-4zz-st                      | 705701      | 4        | NM_013891.4    | 1251         | 1478        |
| BA-Hs-SPDEF-E2E3                     | 704211      | 1        | NM_012391.2    | 843          | 879         |

379

380

381 **References:**

- 382 1. You Y, and Brody SL. Culture and differentiation of mouse tracheal epithelial cells. *Methods in molecular*  
383 *biology*. 2013;945:123-43.
- 384 2. Ribeiro CM, Paradiso AM, Carew MA, Shears SB, and Boucher RC. Cystic fibrosis airway epithelial Ca<sup>2+</sup> i  
385 signaling: the mechanism for the larger agonist-mediated Ca<sup>2+</sup> i signals in human cystic fibrosis airway  
386 epithelia. *J Biol Chem*. 2005;280(11):10202-9.
- 387 3. Abdullah LH, Coakley R, Webster MJ, Zhu Y, Tarran R, Radicioni G, et al. Mucin Production and Hydration  
388 Responses to Mucopurulent Materials in Normal versus Cystic Fibrosis Airway Epithelia. *Am J Respir Crit*  
389 *Care Med*. 2018;197(4):481-91.
- 390 4. Chen G, Volmer AS, Wilkinson KJ, Deng Y, Jones LC, Yu D, et al. Role of Spdef in the Regulation of Muc5b  
391 Expression in the Airways of Naive and Muco-obstructed Mice. *Am J Respir Cell Mol Biol*. 2018.
- 392 5. Chen G, Korfhagen TR, Karp CL, Impey S, Xu Y, Randell SH, et al. Foxa3 induces goblet cell metaplasia and  
393 inhibits innate antiviral immunity. *Am J Respir Crit Care Med*. 2014;189(3):301-13.
- 394 6. Kesimer M, Cullen J, Cao R, Radicioni G, Mathews KG, Seiler G, et al. Excess Secretion of Gel-Forming  
395 Mucins and Associated Innate Defense Proteins with Defective Mucin Un-Packaging Underpin  
396 Gallbladder Mucocele Formation in Dogs. *PLoS One*. 2015;10(9):e0138988.
- 397 7. Knowles MR, Robinson JM, Wood RE, Pue CA, Mentz WM, Wager GC, et al. Ion composition of airway  
398 surface liquid of patients with cystic fibrosis as compared with normal and disease-control subjects. *J*  
399 *Clin Invest*. 1997;100(10):2588-95.
- 400 8. Button B, Cai LH, Ehre C, Kesimer M, Hill DB, Sheehan JK, et al. A periciliary brush promotes the lung  
401 health by separating the mucus layer from airway epithelia. *Science*. 2012;337(6097):937-41.
- 402 9. Henderson AG, Ehre C, Button B, Abdullah LH, Cai LH, Leigh MW, et al. Mucins Are Abnormally  
403 Concentrated in CF Respiratory Secretions. *Journal of Clinical Investigation*. 2014.
- 404 10. Hovenberg HW, Davies JR, and Carlstedt I. Different mucins are produced by the surface epithelium and  
405 the submucosa in human trachea: identification of MUC5AC as a major mucin from the goblet cells.  
406 *Biochem J*. 1996;318 ( Pt 1):319-24.
- 407 11. Thornton DJ, Gray T, Nettesheim P, Howard M, Koo JS, and Sheehan JK. Characterization of mucins from  
408 cultured normal human tracheobronchial epithelial cells. *American journal of physiology Lung cellular*  
409 *and molecular physiology*. 2000;278(6):L1118-28.
- 410 12. Livraghi-Butrico A, Grubb BR, Wilkinson KJ, Volmer AS, Burns KA, Evans CM, et al. Contribution of mucus  
411 concentration and secreted mucins Muc5ac and Muc5b to the pathogenesis of muco-obstructive lung  
412 disease. *Mucosal Immunol*. 2017;10(2):395-407.
- 413 13. Sanjana NE, Shalem O, and Zhang F. Improved vectors and genome-wide libraries for CRISPR screening.  
414 *Nat Methods*. 2014;11(8):783-4.
- 415 14. Chen G, Korfhagen TR, Xu Y, Kitzmiller J, Wert SE, Maeda Y, et al. SPDEF is required for mouse pulmonary  
416 goblet cell differentiation and regulates a network of genes associated with mucus production. *J Clin*  
417 *Invest*. 2009;119(10):2914-24.
- 418 15. Horani A, Nath A, Wasserman MG, Huang T, and Brody SL. Rho-associated protein kinase inhibition  
419 enhances airway epithelial Basal-cell proliferation and lentivirus transduction. *Am J Respir Cell Mol Biol*.  
420 2013;49(3):341-7.
- 421 16. Gentsch M, Boyles SE, Cheluvvaraju C, Chaudhry IG, Quinney NL, Cho C, et al. Pharmacological Rescue of  
422 Conditionally Reprogrammed Cystic Fibrosis Bronchial Epithelial Cells. *Am J Respir Cell Mol Biol*.  
423 2017;56(5):568-74.
- 424 17. Martinovich KM, Iosifidis T, Buckley AG, Looi K, Ling KM, Sutanto EN, et al. Conditionally reprogrammed  
425 primary airway epithelial cells maintain morphology, lineage and disease specific functional  
426 characteristics. *Sci Rep*. 2017;7(1):17971.

427 18. Fulcher ML, Gabriel SE, Olsen JC, Tatreau JR, Gentsch M, Livanos E, et al. Novel human bronchial  
428 epithelial cell lines for cystic fibrosis research. *American journal of physiology Lung cellular and*  
429 *molecular physiology*. 2009;296(1):L82-91.

430 19. Supryniewicz FA, Upadhyay G, Krawczyk E, Kramer SC, Hebert JD, Liu X, et al. Conditionally  
431 reprogrammed cells represent a stem-like state of adult epithelial cells. *Proceedings of the National*  
432 *Academy of Sciences of the United States of America*. 2012;109(49):20035-40.

433 20. Zhu Y, Abdullah LH, Doyle SP, Nguyen K, Ribeiro CM, Vasquez PA, et al. Baseline Goblet Cell Mucin  
434 Secretion in the Airways Exceeds Stimulated Secretion over Extended Time Periods, and Is Sensitive to  
435 Shear Stress and Intracellular Mucin Stores. *PLoS One*. 2015;10(5):e0127267.

436 21. Okuda K, Chen G, Subramani DB, Wolf M, Gilmore RC, Kato T, et al. Localization of Secretory Mucins  
437 MUC5AC and MUC5B in Normal/Healthy Human Airways. *Am J Respir Crit Care Med*. 2019;199(6):715-  
438 27.

439 22. Burgel PR, Montani D, Danel C, Dusser DJ, and Nadel JA. A morphometric study of mucins and small  
440 airway plugging in cystic fibrosis. *Thorax*. 2007;62(2):153-61.

441 23. Manikandan S. Data transformation. *J Pharmacol Pharmacother*. 2010;1(2):126-7.

442
